# Supplementary material
Source: publisher figshare collection journal article supplement (https://acs.figshare.com/ndownloader/files/3883507)
Supplement: Supplementary file 1 [file 3883507]

# Guest Exchange through Single Crystal-Single Crystal Transformations in a Flexible Hydrogen-Bonded Framework

Wenchang Xiao, Chunhua Hu and Michael D. Ward\*

Contribution from the Department of Chemistry and the Molecular Design Institute, New York University,  
100 Washington Square East, New York, NY 10003-6688

## Supporting information

### Contents

#### Materials and General Procedures

#### X-ray Diffraction Methods

**Figure S1.** (A) Crystal of  $G_4\text{TSPB}(\text{dioxane})_5$  and indexed faces. (B) Crystal from A after standing in ambient air for one day, transforming to  $G_4\text{TSPB}(\text{dioxane})_4$ , and its indexed faces. (C) Crystal from B after immersion in dioxane for four hours, reverting  $G_4\text{TSPB}(\text{dioxane})_5$ , and its indexed faces.

**Table S1.** Crystallographic information for crystals A, B and C in Figure S1.

**Figure S2.** Side view of the  $G_4\text{TSPB}$  cylinders, which are oriented along the  $a$  axis. Dioxane molecules are removed for clarity.

**Figure S3.** NMR spectrum of a  $G_4\text{TSPB}(\text{dioxane})_5$  single crystal, indicating a host:dioxane ratio of 1:5. NMR solvent: dimethylsulfoxide.

**Figure S4.** NMR spectrum of a  $G_4\text{TSPB}(\text{dioxane})_4$  single crystal, indicating a host:dioxane ratio of 1:4. NMR solvent: dimethylsulfoxide.

**Figure S5.** (black curve) TGA of  $G_4\text{TSPB}(\text{dioxane})_5$ ; (red curve)  $G_4\text{TSPB}(\text{dioxane})_4$ . Heating rate = 10 °C/min.

**Figure S6.** Powder X-ray diffraction illustrating the reversibility of transformation between  $G_4\text{TSPB}(\text{dioxane})_5$  and  $G_4\text{TSPB}(\text{dioxane})_4$ . From bottom to top: (black) Powder pattern calculated from the single crystal structure of  $G_4\text{TSPB}(\text{dioxane})_5$ ; (red)  $G_4\text{TSPB}(\text{dioxane})_5$  after standing in air for one day, followed by immersion in dioxane for four hours; (blue) repetition of the same cycle; (green) second repetition of the same cycle; (purple) third repetition of the same cycle; (brown) fourth repetition of the same cycle

**Figure S7.** Powder X-ray diffraction characterization of  $G_4\text{TSPB}(\text{dioxane})_5$  upon heating to various temperature. From bottom to top: (blue) Powder diffraction pattern calculated from the single crystal structure of  $G_4\text{TSPB}(\text{dioxane})_5$ , (black)  $G_4\text{TSPB}(\text{dioxane})_5$  at room temperature; (red) after heating to 373 K, after heating to 473 K (green).

**Figure S8.** (black at bottom) NMR spectra of a  $G_4\text{TSPB}(\text{dioxane})_5$  single crystal; (blue)  $G_4\text{TSPB}(\text{dioxane})_5$  single crystal after immersion for four hours in THF, transforming to  $G_4\text{TSPB}(\text{THF})_5$ ; (red)  $G_4\text{TSPB}(\text{dioxane})_5$  single crystal after immersion for four hours in toluene, transforming to  $G_4\text{TSPB}(\text{toluene})_3(\text{dioxane})$ ; (pink)  $G_4\text{TSPB}(\text{dioxane})_5$  single crystal after immersion for four hours in nitrobenzene, transforming to  $G_4\text{TSPB}(\text{nitrobenzene})_{1.5}$ ; (black at top)  $G_4\text{TSPB}(\text{dioxane})_5$  single crystal after immersion for four hours in aniline, transforming to  $G_4\text{TSPB}(\text{aniline})_5$ . NMR solvent: dimethylsulfoxide.

**Figure S9.** Powder X-ray diffraction of  $G_4\text{TSPB}$  samples after exchange with various guests. From bottom to top: (black) Powder diffraction pattern calculated from single crystal structure of  $G_4\text{TSPB}(\text{dioxane})_5$ ; (red) experimental powder diffraction pattern of  $G_4\text{TSPB}(\text{dioxane})_5$ ; (blue) after immersion in THF for four hours; (green) after immersion in aniline for four hours, (purple) after immersion in toluene for four hours; (brown) after immersion in nitrobenzene for four hours.

**Figure S10.** (A) Crystal of  $G_4\text{TSPB}(\text{dioxane})_5$  and indexed faces. (B) Crystal from A after immersion in THF for four hours, transforming to  $G_4\text{TSPB}(\text{THF})_5$ . (C) Crystal from B after immersion in dioxane for four hours, reverting back to  $G_4\text{TSPB}(\text{dioxane})_5$ .

**Table S2.** Crystallographic information for crystals A, B and C mentioned in Figure S10.

**Figure S11.** From bottom to top: (black) NMR spectrum of a  $G_4TSPB(dioxane)_5$  single crystal; (blue)  $G_4TSPB(dioxane)_5$  single crystal after immersion in THF for four hours, transforming to  $G_4TSPB(THF)_5$ ; (red) the  $G_4TSPB(THF)_5$  crystal after immersion in dioxane for four hours, reverting to  $G_4TSPB(dioxane)_5$ . NMR solvent: dimethylsulfoxide.

**Figure S12.** (black curve) TGA of  $G_4TSPB(dioxane)_5$ ; (red curve)  $G_4TSPB(THF)_5$ . Heating rate = 10 °C/min.

**Figure S13.** Powder X-ray diffraction illustrating the reversibility of transformation between  $G_4TSPB(dioxane)_5$  and  $G_4TSPB(THF)_5$ . From bottom to top: (black) Powder pattern calculated from the single crystal structure of  $G_4TSPB(dioxane)_5$ ; (red)  $G_4TSPB(dioxane)_5$  after immersion in THF for four hours followed by immersion in dioxane for four hours; (blue) first repetition of the same cycle; (green) second repetition of the same cycle; (purple) third repetition of the same cycle; (brown) fourth repetition of the same cycle.

**Figure S14.** (A) Crystal of  $G_4TSPB(dioxane)_5$  and indexed faces. (B) Crystal from A after immersion in toluene for four hours, transforming to  $G_4TSPB(toluene)_3(dioxane)$ . (C) Crystal from B after immersion in dioxane for four hours, reverting back to  $G_4TSPB(dioxane)_5$ .

**Table S3.** Crystallographic information for crystals A, B and C in Figure S14.

**Figure S15.** Powder X-ray diffraction illustrating the reversibility of transformation between  $G_4TSPB(dioxane)_5$  and  $G_4TSPB(toluene)_3(dioxane)$ . From bottom to top: (black) Powder pattern calculated from the single crystal structure of  $G_4TSPB(dioxane)_5$ ; (red)  $G_4TSPB(dioxane)_5$  after immersion in toluene for four hours followed by immersion in dioxane for four hours; (blue) first repetition of the same cycle; (green) second repetition of the same cycle; (purple) third repetition of the same cycle; (brown) fourth repetition of the same cycle.

**Figure S16.** From bottom to top: (black) NMR spectrum of a  $G_4TSPB(dioxane)_5$  single crystal; (red)  $G_4TSPB(dioxane)_5$  single crystal after immersion in toluene for four hours, transforming to  $G_4TSPB(toluene)_3(dioxane)$ ; (blue)  $G_4TSPB(toluene)_3(dioxane)$  crystal after immersion in dioxane for four hours, reverting to  $G_4TSPB(dioxane)_5$ . NMR solvent: dimethylsulfoxide.

**Figure S17.** From bottom to top: (black) NMR spectrum of a  $G_4TSPB(dioxane)_5$  single crystal; (blue)  $G_4TSPB(dioxane)_5$  single crystal after immersion in toluene for one day, transforming to  $G_4TSPB(toluene)_3(dioxane)$ ; (red)  $G_4TSPB(dioxane)_5$  single crystal after immersion in toluene for nine days, transforming to  $G_4TSPB(toluene)_3(dioxane)$  but with no further exchange with toluene. NMR solvent: dimethylsulfoxide.

**Figure S18.** (black curve) TGA of  $G_4TSPB(dioxane)_5$ ; (red curve)  $G_4TSPB(toluene)_3(dioxane)$ . Heating rate = 10 °C/min.

**Figure S19.** (A) Crystal of  $G_4TSPB(THF)_5$  and indexed faces. (B) Crystal from A after immersion in toluene for four hours, transforming to  $G_4TSPB(toluene)_3(THF)_{0.5}$ . (C) Crystal from B after immersion in dioxane for four hours, reverting to  $G_4TSPB(THF)_5$ .

**Table S4.** Crystallographic information for crystals A, B and C in Figure S19.

**Figure S20.** From bottom to top: (black) NMR spectrum of a  $G_4TSPB(THF)_5$  single crystal; (red)  $G_4TSPB(THF)_5$  single crystal after immersion in toluene for four hours, transforming to  $G_4TSPB(toluene)_3(THF)_{0.5}$ ; (blue)  $G_4TSPB(toluene)_3(THF)_{0.5}$  single crystal after immersion in THF for four hours, reverting to  $G_4TSPB(THF)_5$ . NMR solvent: dimethylsulfoxide.

**Figure S21.** (black curve) TGA of  $G_4TSPB(THF)_5$ ; (red curve)  $G_4TSPB(toluene)_3(THF)_{0.5}$ . Heating rate = 10 °C/min.

**Figure S22.** Powder X-ray diffraction illustrating the reversibility of transformation between  $G_4TSPB(THF)_5$  and  $G_4TSPB(toluene)_3(THF)_{0.5}$ . From bottom to top: (black) Powder pattern calculated from the single crystal structure of  $G_4TSPB(THF)_5$ ; (red)  $G_4TSPB(THF)_5$  after immersion in toluene for four hours followed by immersion in THF for four hours; (blue) first repetition of the same cycle; (green) second repetition of the same cycle; (purple) third repetition of the same cycle; (brown) fourth repetition of the same cycle.

**Figure S23.** (A) Crystal of  $G_4TSPB(toluene)_3(dioxane)$  and indexed faces. (B) Crystal from A after immersion in THF for four hours, transforming to  $G_4TSPB(THF)_5$ .

**Table S5.** Crystallographic information for crystals A and B in Figure S23.

**Figure S24.** From bottom to top: (black) NMR spectrum of a  $G_4TSPB(toluene)_3(dioxane)$  single crystal; (red)  $G_4TSPB(toluene)_3(dioxane)$  single crystal after immersion in THF for four hours, transforming to  $G_4TSPB(THF)_5$ . NMR solvent: dimethylsulfoxide.

**Figure S25.** (A) Crystal of  $G_4TSPB \cdot (toluene)_3(THF)_{0.5}$  and indexed faces. (B) Crystal from A after immersion in dioxane for four hours, transforming to  $G_4TSPB \cdot (dioxane)_5$ .

**Table S6.** Crystallographic information for crystals A and B in Figure S25.

**Figure S26.** From bottom to top: (black) NMR spectrum of a  $G_4TSPB \cdot (toluene)_3(THF)_{0.5}$  single crystal; (red)  $G_4TSPB \cdot (toluene)_3(THF)_{0.5}$  single crystal after immersion in dioxane for four hours, transforming to  $G_4TSPB \cdot (dioxane)_5$ . NMR solvent: dimethylsulfoxide.

**Figure S27.** From bottom to top: (black) NMR spectrum of  $G_4TSPB$  precipitate formed by layering toluene on a methanol solution of  $G_4TSPB$ ; (red)  $G_4TSPB$  precipitate formed by layering a methanol solution of  $G_4TSPB$  on aniline; (orange)  $G_4TSPB$  precipitate formed by layering a methanol solution of  $G_4TSPB$  on nitrobenzene. NMR solvent: dimethylsulfoxide. Attempts to grow single crystals of toluene, aniline and nitrobenzene inclusion compounds were not successful.

**Figure S28.** (black) Powder X-ray diffraction characterization of  $G_4TSPB$  precipitate formed by layering toluene on a methanol solution of  $G_4TSPB$ ; (red)  $G_4TSPB$  precipitate formed by layering a methanol solution of  $G_4TSPB$  on aniline; (blue)  $G_4TSPB$  precipitate formed by layering a methanol solution of  $G_4TSPB$  on nitrobenzene.

## Materials and general procedures

All chemicals were purchased from Sigma-Aldrich (St. Louis, MO, USA) and used as received.

**Synthesis of guanidinium 1,2,4,5-tetra(4-sulfonatophenyl)-benzene ( $G_4$ TSPB).** 2 g 1,2,4,5-tetrabromo-benzene, 3.66 g phenylboronic acid, 0.3 g Tetrakis(triphenylphosphine)palladium and 8.3 g  $K_2CO_3$  were suspended in a solution comprising 30 mL ethanol, 30 mL water, and 60 mL toluene. The mixture was heated at 95 °C for 18 hours. After cooling to room temperature, 300 mL of toluene was added and the mixture was stirred for one hour. The organic layer was washed with 1M NaOH twice and then dried with anhydrous  $MgSO_4$ . Excess toluene was removed by rotary evaporator, and the solid product was re-crystallized in hexane to afford 1.2 g of an off-white solid (1,2,4,5-tetraphenylbenzene, Yield = 62% based on 1,2,4,5-tetrabromo-benzene). The solid was then heated under reflux in 6 mL of 95%  $H_2SO_4$  for 18 hours, after which the hot solution was poured into 100 mL of deionized water. NaOH was added to adjust the pH to pH = 14, and then 1.7 g  $N(butyl)_4Cl$  was added. The mixture was then extracted with  $CH_2Cl_2$ , the organic layer dried with anhydrous  $MgSO_4$ , and excess solvent removed. The resulting solid was then passed through a column packed with Amberlyst 36 ion exchange resin. To the eluent was added 2 g of guanidinium tetrafluoroborate. The mixture was then dried with a rotary evaporator, and the resulting solid mixture was washed with hot acetone several times and dried by allowing standing in air at room temperature, affording 1.7 g of off-white  $G_4$ TSPB.  $^1H$  NMR (400M, DMSO): 7.50 (d, 8H), 7.43 (s, 2H), 7.19 (d, 8H), 6.94 (s, 24H). Elemental analysis for  $C_{34}H_{46}O_{12}S_4N_{12}$ . Calculated: C (43.28%), H (4.88%), N (17.82%); measured: C (43.55%), H (5.03%), N (18.35%). IR: 3417 (w), 3195 (w), 1667 (s), 1179 (w), 1127 (s), 1035 (s), 1008 (s), 1000 (s), 832 (s), 753 (s), 691 (m), 661 (s).

**Preparation of  $G_4$ TSPB(dioxane) $_5$ .** 20 mg  $G_4$ TSPB was dissolved in 0.4 mL water, followed by diffusion of dioxane vapor into the solution, affording single crystals. Elemental analysis for  $C_{54}H_{86}O_{22}S_4N_{12}$ . Calculated: C (46.89%), H (6.22%), N (12.17%); measured: C (47.31%), H (6.38%), N (12.05%). IR: 3368 (w), 3194 (w), 1663 (s), 1596 (w), 1475 (m), 1187 (w), 1121 (s), 1036 (s), 1000 (m), 873 (s), 830 (s), 755 (s), 660 (m).

**Preparation of  $G_4$ TSPB(dioxane) $_4$ .** Single crystals of  $G_4$ TSPB(dioxane) $_5$  were exposed to air under ambient conditions for one day, affording  $G_4$ TSPB(dioxane) $_4$ . Elemental analysis for  $C_{50}H_{78}O_{20}S_4N_{12}$ . Calculated: C (46.37%), H (6.03%), N (12.98%); measured: C (46.24%), H (6.11%), N (12.69%). IR: 3367 (w), 3196 (w), 1663 (s), 1596 (w), 1475 (m), 1187 (w), 1121 (s), 1036 (s), 1001 (m), 873 (s), 830 (s), 755 (s), 660 (m).

**Preparation of  $G_4$ TSPB(tetrahydrofuran) $_5$ .** Single crystals of  $G_4$ TSPB(dioxane) $_5$  were immersed in tetrahydrofuran for four hours, affording  $G_4$ TSPB(tetrahydrofuran) $_5$ . Elemental Analysis for Guest Exchange through Single Crystal-Single Crystal Transformations in a Flexible Hydrogen-Bonded Framework

C<sub>54</sub>H<sub>86</sub>O<sub>17</sub>S<sub>4</sub>N<sub>12</sub>. Calculated: C (49.77%), H (6.61%), N (12.90%); measured: C (49.62%), H (6.52%), N (13.17%). IR: 3421 (w), 3360 (w), 3174 (s), 1669 (s), 1187 (s), 1128 (s), 1034 (s), 1008 (s), 829 (s), 692 (s), 656 (s), 579 (s), 537 (s).

**Preparation of G<sub>4</sub>TSPB'(toluene)<sub>3</sub>(dioxane):** Single crystals of G<sub>4</sub>TSPB'(dioxane)<sub>5</sub> were immersed in toluene for four hours, crystals affording G<sub>4</sub>TSPB'(toluene)<sub>3</sub>(dioxane). Elemental Analysis for C<sub>59</sub>H<sub>78</sub>O<sub>14</sub>S<sub>4</sub>N<sub>12</sub>. Calculated: C (54.21%), H (5.97%), N (12.86%); measured: C (53.88%), H (6.03%), N (12.96%). IR: 3419 (w), 3178 (w), 1669 (s), 1187 (s), 1128 (s), 1034 (s), 1008 (s), 828 (s), 692 (s), 659 (s), 579 (s).

**Preparation of G<sub>4</sub>TSPB'(toluene)<sub>3</sub>(tetrahydro-furan)<sub>0.5</sub>:** Single crystals of G<sub>4</sub>TSPB'(tetrahydrofuran)<sub>5</sub> were immersed in toluene for four hours, affording G<sub>4</sub>TSPB'(toluene)<sub>3</sub>(tetra-hydrofuran)<sub>0.5</sub>. Elemental Analysis for C<sub>57</sub>H<sub>74</sub>O<sub>12.5</sub>S<sub>4</sub>N<sub>12</sub>. Calculated: C (54.54%), H (5.90%), N (13.39%); measured: C (54.10%), H (6.03%), N (13.67%). IR: 3421 (w), 3360 (w), 3174 (s), 1669 (s), 1187 (s), 1128 (s), 1034 (s), 1008 (s), 828 (s), 692 (s), 656 (s), 579 (s), 537 (s).

**Characterization.** Infrared spectra were collected with a Magna-IR spectrometer 550. NMR data was collected under Bruker AV-400 High Performance Digital NMR Spectrometer (400 MHz). Thermal gravimetric analysis (TGA) was performed with a Perkin Elmer Pyris 1. Elemental analysis was performed with a Perkin Elmer Series II 2400.

### X-ray Diffraction Methods

**Single Crystal X-ray Diffraction.** Data using Mo radiation was collected on a Bruker SMART APEX II diffractometer equipped with a CCD detector and operated at 1,500W power (50KV, 30mA) to generate Mo K $\alpha$  radiation ( $\lambda = 0.71073 \text{ \AA}$ ), which is graphite monochromated and MonoCap-collimated. The crystal was mounted on an 0.3 mm 20-micron-thick Nylon Cryoloop (Hampton Research) with Immersion Oil of Type B (Cargille Labs) frozen at 100 K with an Oxford Cryosystems 700 plus Cooler. Preliminary lattice parameters and orientation matrices were obtained from three sets of frames. Then full data were collected using the  $\omega$  scan method with the frame width of  $0.5^\circ$ . Data were processed with the SAINT+ program<sup>2</sup> for reduction and cell refinement. Multi-scan absorption corrections were applied by using the SADABS program for area detector. All structures were solved by the direct method (SHELXS-97) and refined on F<sup>2</sup> (SHELXL-97)<sup>3</sup>. Non-hydrogen atoms were refined with anisotropic displacement parameters, and hydrogen atoms on carbons were placed in idealized positions (C-H = 0.93 or 0.96  $\text{\AA}$ ) and included as riding with Uiso(H) = 1.2 or 1.5 Ueq(non-H). The PLATON/SQUEEZE<sup>4</sup> procedure was applied to handle the heavily disordered components (ions and solvents) in the voids of the frameworks. Pore size was calculated from Mercury software, using probe radius 1.2  $\text{\AA}$ . Guest molecule volume was Guest Exchange through Single Crystal-Single Crystal Transformations in a Flexible Hydrogen-Bonded Framework

calculated from Material Studio through following procedures: 1 optimize molecular geometry; 2 generate solvent accessible surface under force “ultra fine” model (probe radius 1.2 Å); 3 calculate molecular volume.

**Powder X-Ray Diffraction.** Powder X-ray diffraction (PXRD) was performed with a Bruker D8 Discover Microdiffractometer with the General Area Detector Diffraction System (GADDS) equipped with a VÅNTEC-2000 2D detector. The X-ray beam was monochromated with a graphite crystal ( $\lambda$  Cu-K $\alpha$  = 1.54178 Å) and collimated with a 0.5 mm capillary collimator (MONOCAP). The powder sample was filled in a 0.8 mm capillary tube and mounted in a vertical configuration on a sample stage affixed to a five-circle Eulerian cradle. The two-dimensional (2D) diffraction data was collected by the software GADDS.<sup>5</sup> Two scans (or one scan) with the rotation of the capillary were acquired at the incident angle ( $\theta_1$ ) = detector angle ( $\theta_2$ ) = 10° and 25°, respectively. At each angle, the exposure time was 10 minutes. The sample-to-detector distance was 150 mm. One-dimensional diffraction patterns were generated by integrating the 2D XRD data using XRD2EVAL in the Bruker PILOT software.<sup>6</sup> The integrated 1D pattern was analyzed by the software DIFFRAC<sup>plus</sup> EVA<sup>[5]</sup>. The simulated 1D powder pattern was calculated by the software Mercury.<sup>7</sup>

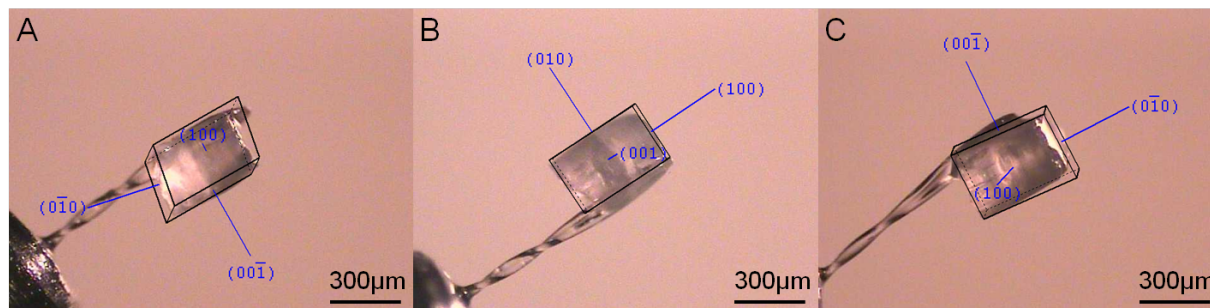

**Figure S1.** (A) Crystal of  $G_4TSPB'(dioxane)_5$  and indexed faces. (B) Crystal from A after standing in ambient air for one day, transforming to  $G_4TSPB(dioxane)_4$ , and its indexed faces. (C) Crystal from B after immersion in dioxane for four hours, reverting  $G_4TSPB'(dioxane)_5$ , and its indexed faces.

**Table S1.** Crystallographic information for crystals A, B and C in Figure S1.

| compound                   | $G_4TSPB'(dioxane)_5$         | $G_4TSPB(dioxane)_4$          | $G_4TSPB'(dioxane)_5$         |
|----------------------------|-------------------------------|-------------------------------|-------------------------------|
| formula                    | $C_{54}H_{82}N_{12}O_{22}S_4$ | $C_{50}H_{74}N_{12}O_{20}S_4$ | $C_{54}H_{82}N_{12}O_{22}S_4$ |
| crystal system             | Triclinic                     | Monoclinic                    | Triclinic                     |
| space group                | $P1$                          | $P2_1$                        | $P1$                          |
| color                      | Colorless                     | Colorless                     | Colorless                     |
| $a$ (Å)                    | 16.068(4)                     | 6.001(3)                      | 16.11                         |
| $b$ (Å)                    | 18.326(4)                     | 35.559(15)                    | 18.42                         |
| $c$ (Å)                    | 35.252(8)                     | 15.223(6)                     | 35.40                         |
| $\alpha$ (deg)             | 80.336(3)                     | 90                            | 80.21                         |
| $\beta$ (deg)              | 85.481(3)                     | 101.047(4)                    | 85.42                         |
| $\gamma$ (deg)             | 77.775(3)                     | 90                            | 77.75                         |
| $V$ (Å <sup>3</sup> )      | 9990.95                       | 3188.24                       | 10106                         |
| temp (K)                   | 100(2)                        | 100(2)                        | 100(2)                        |
| $Z$                        | 6                             | 2                             | \                             |
| $R_1$ [ $I > 2\sigma(I)$ ] | 0.1302                        | 0.1344                        | \                             |

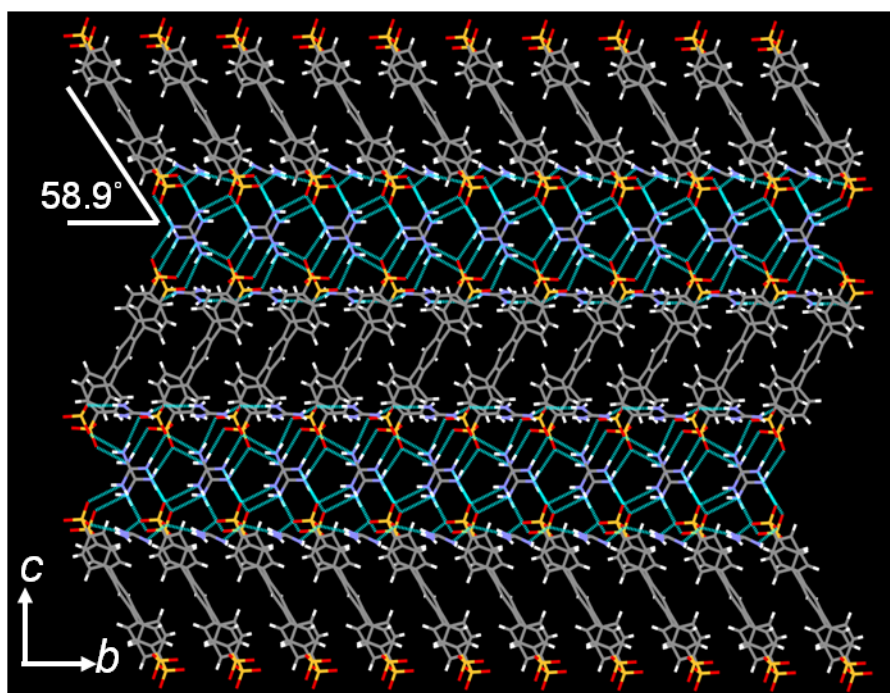

**Figure S2.** Side view of the G<sub>4</sub>TSPB cylinders, which are oriented along the *a* axis. Dioxane molecules are removed for clarity.



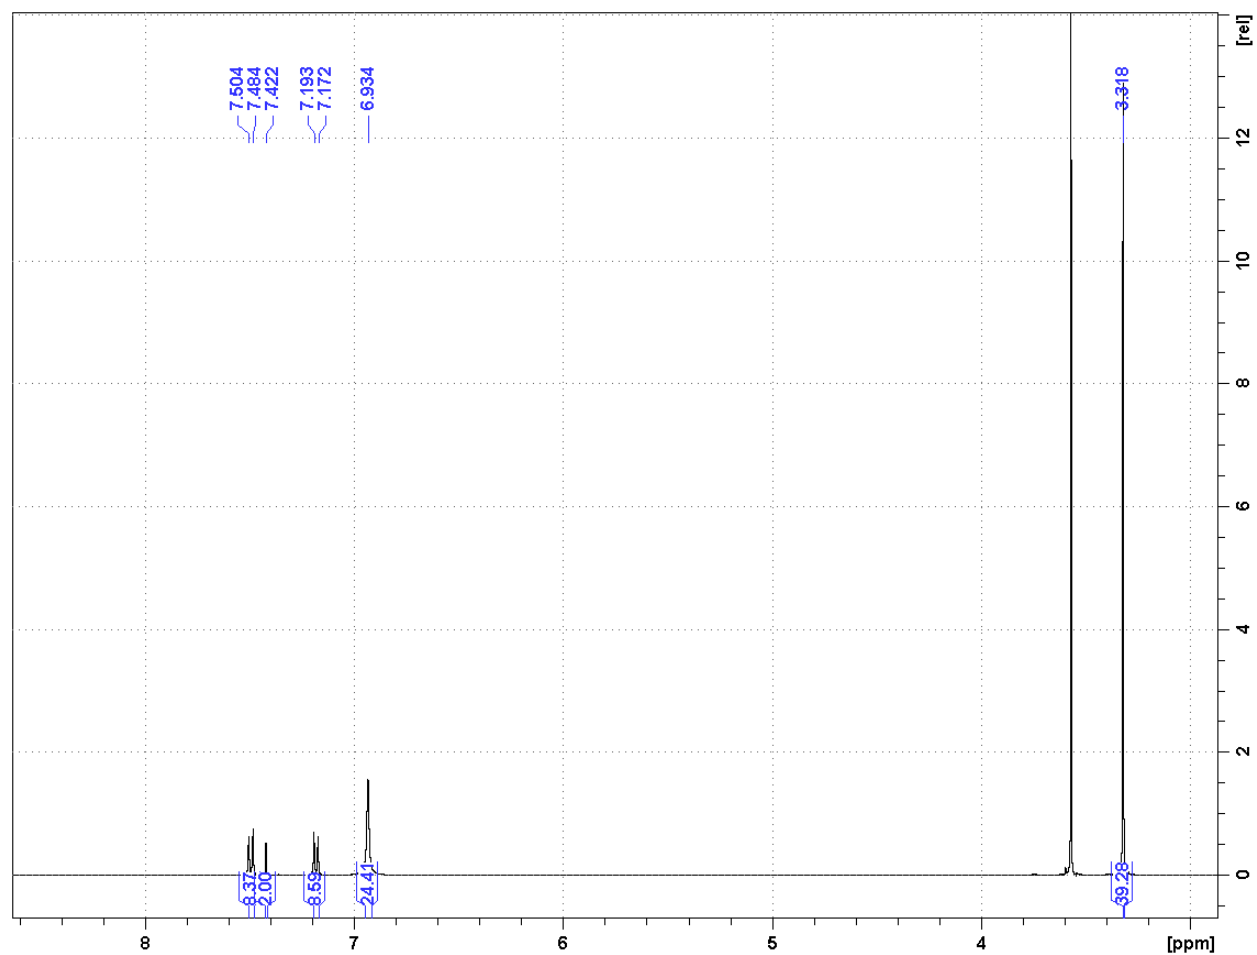

**Figure S3.** NMR spectrum of a  $G_4TSPB(dioxane)_5$  single crystal, indicating a host:dioxane ratio of 1:5. NMR solvent: dimethylsulfoxide.

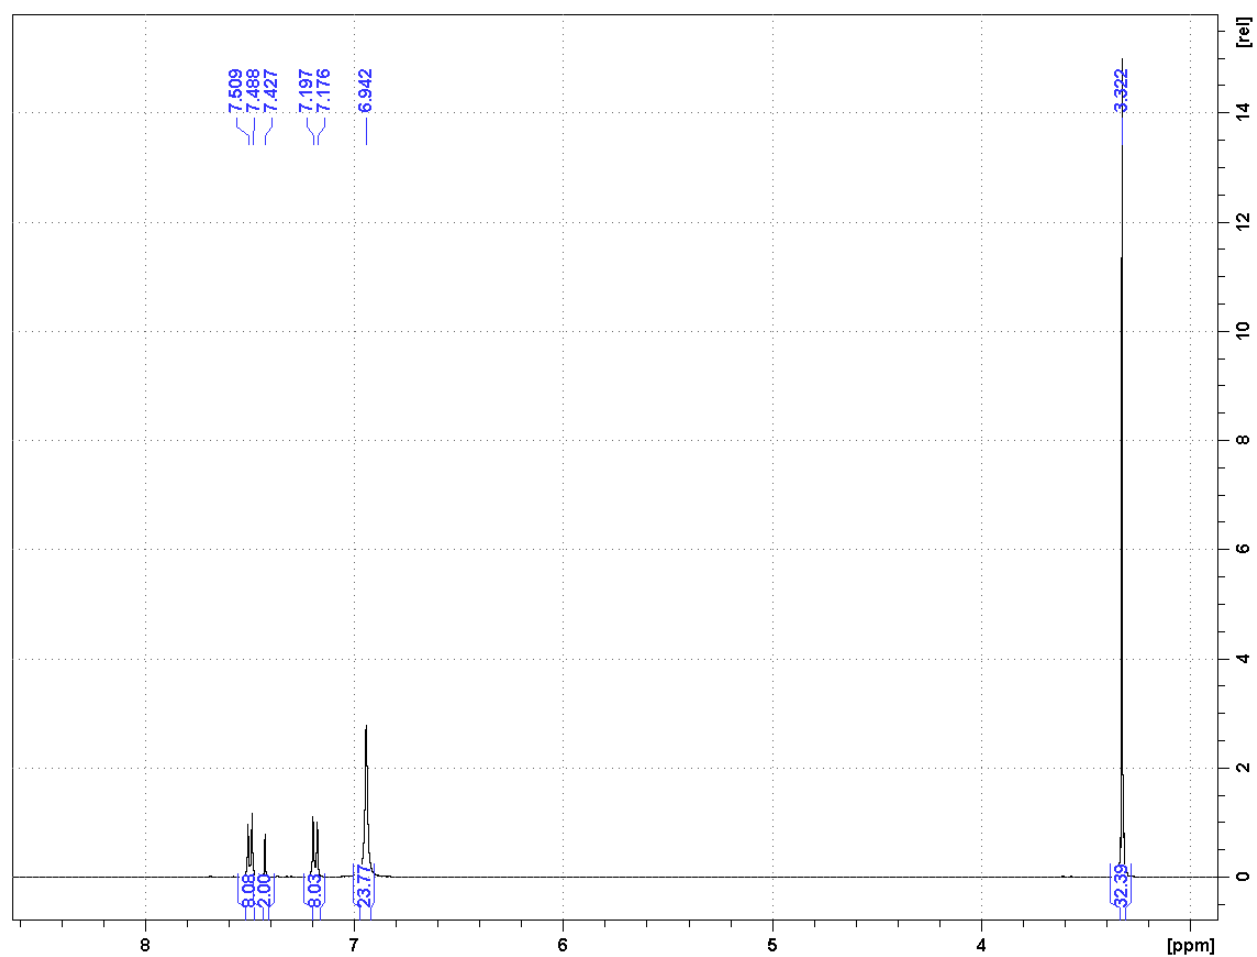

**Figure S4.** NMR spectrum of a  $G_4TSPB(dioxane)_4$  single crystal, indicating a host:dioxane ratio of 1:4. NMR solvent: dimethylsulfoxide.

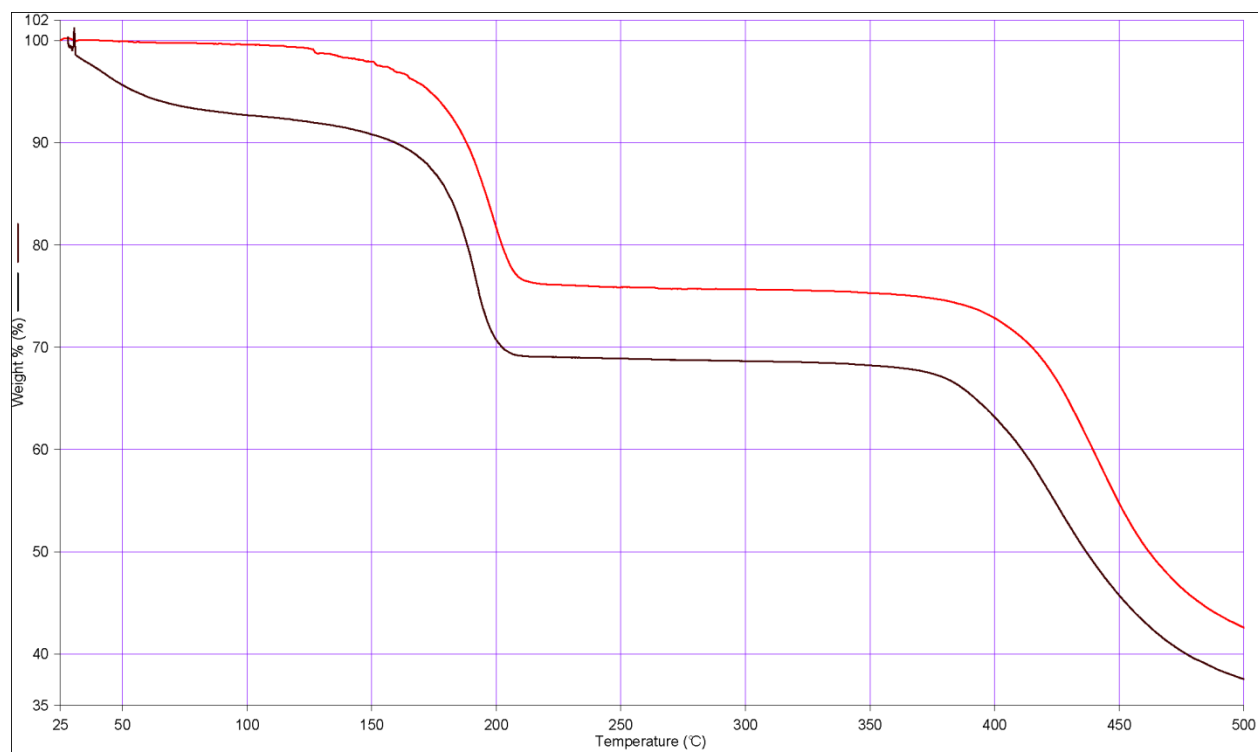

**Figure S5.** (black curve) TGA of  $G_4TSPB(dioxane)_5$ ; (red curve)  $G_4TSPB(dioxane)_4$ . Heating rate = 10 °C/min.

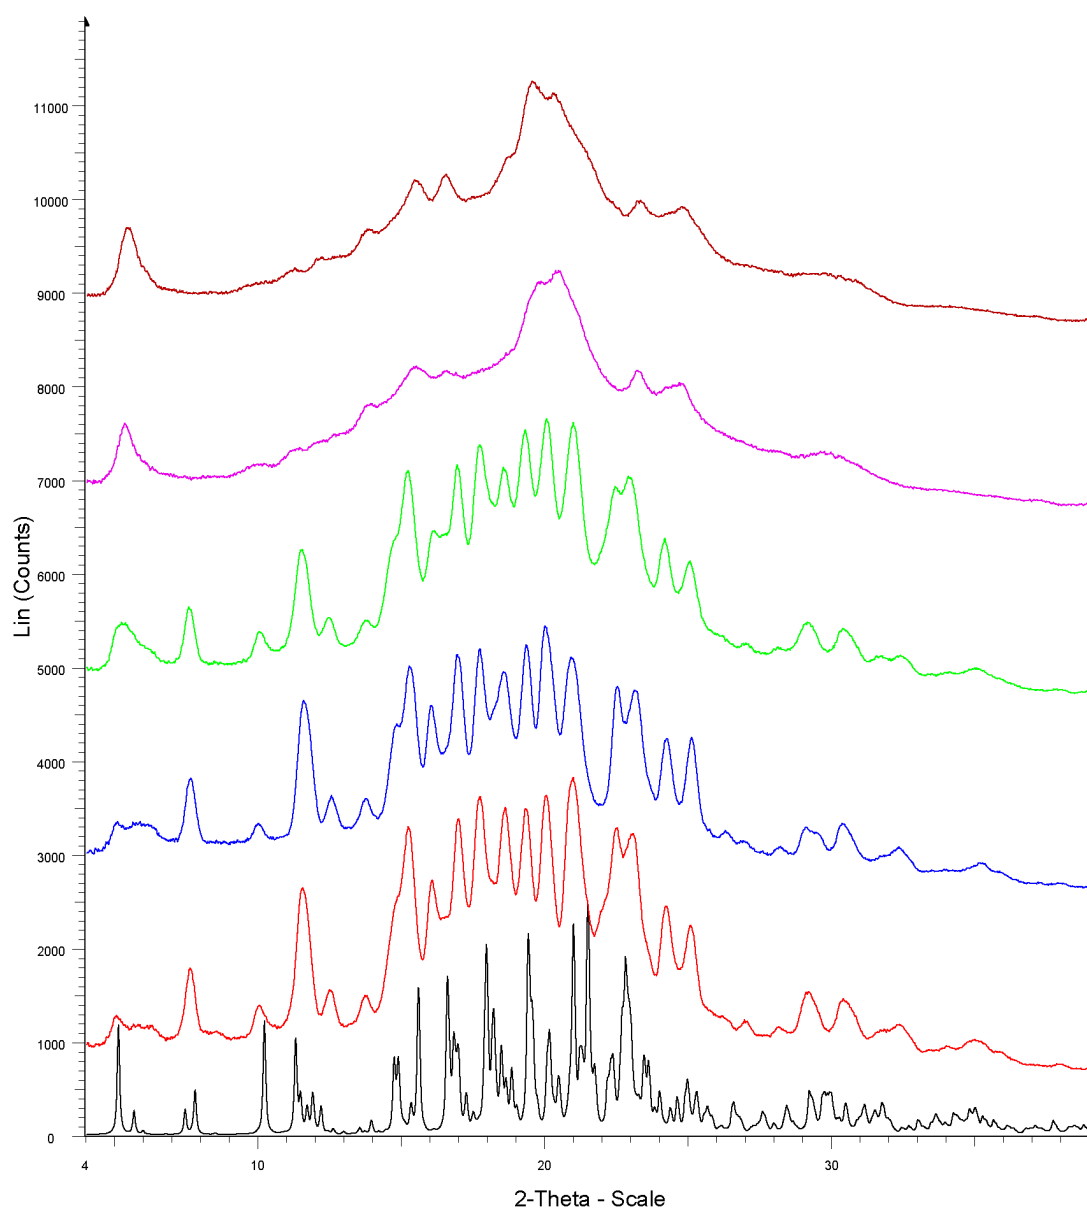

**Figure S6.** Powder X-ray diffraction illustrating the reversibility of transformation between  $G_4TSPB(dioxane)_5$  and  $G_4TSPB(dioxane)_4$ . From bottom to top: (black) Powder pattern calculated from the single crystal structure of  $G_4TSPB(dioxane)_5$ ; (red)  $G_4TSPB(dioxane)_5$  after standing in air for one day, followed by immersion in dioxane for four hours; (blue) repetition of the same cycle; (green) second repetition of the same cycle; (purple) third repetition of the same cycle; (brown) fourth repetition of the same cycle.

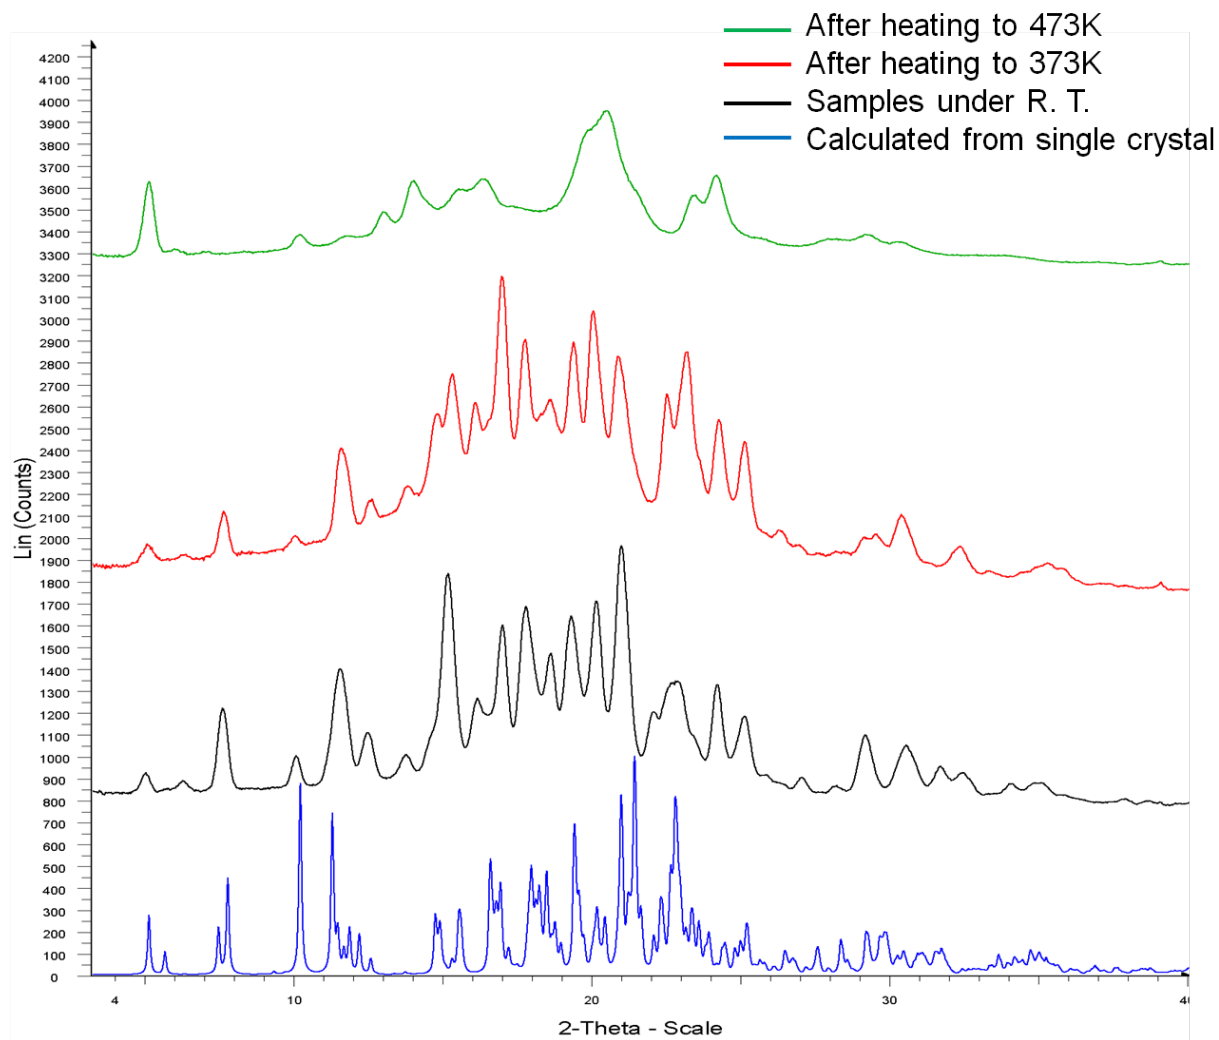

**Figure S7.** Powder X-ray diffraction characterization of  $G_4TSPB(dioxane)_5$  upon heating to various temperature. From bottom to top: (blue) Powder diffraction pattern calculated from the single crystal structure of  $G_4TSPB(dioxane)_5$ , (black)  $G_4TSPB(dioxane)_5$  at room temperature; (red) after heating to 373 K, after heating to 473 K (green).

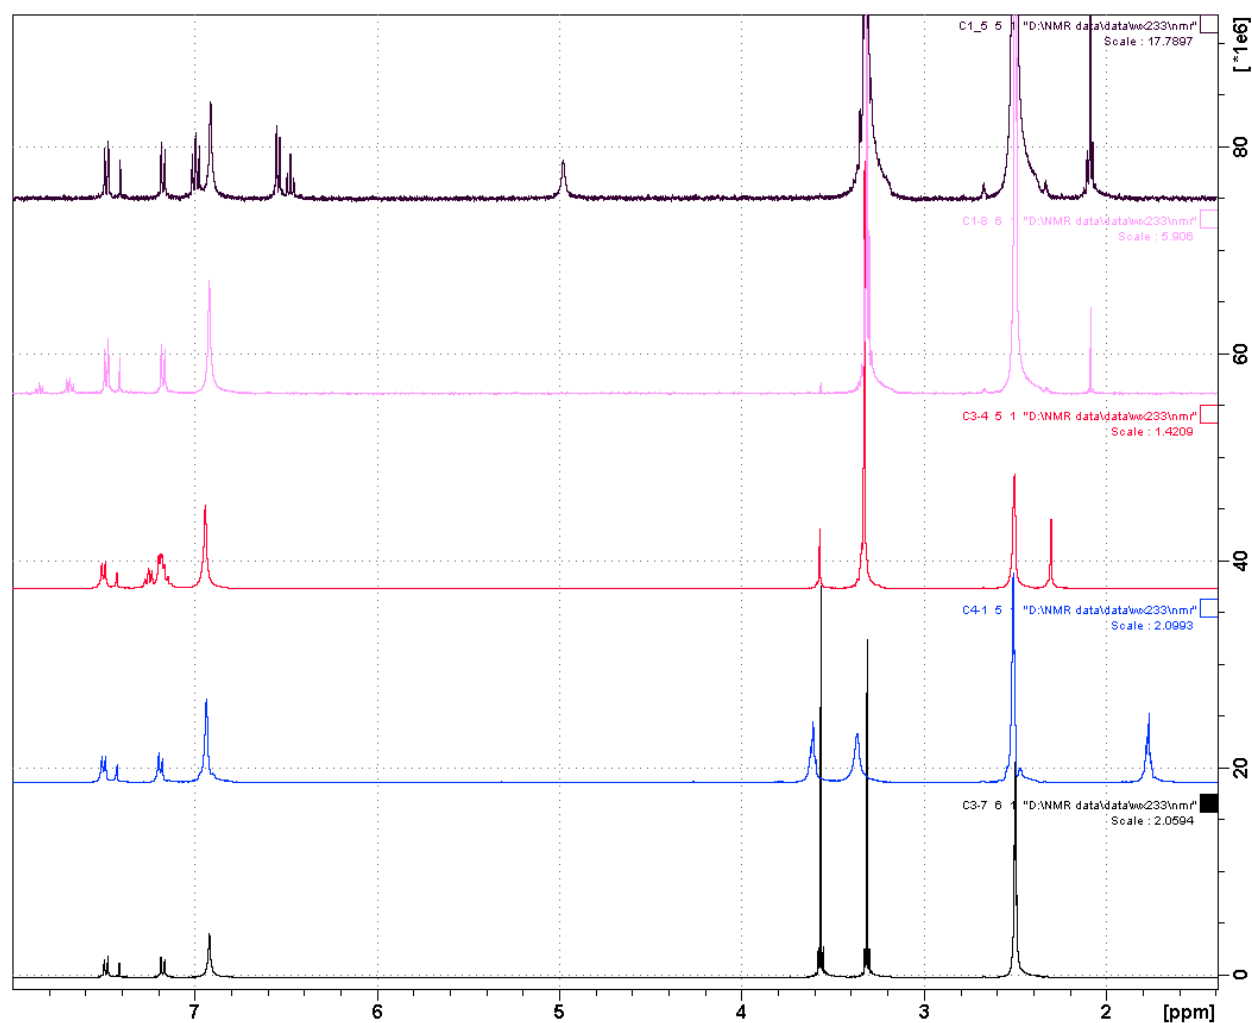

**Figure S8.** (black at bottom) NMR spectra of a  $G_4TSPB(dioxane)_5$  single crystal; (blue)  $G_4TSPB(dioxane)_5$  single crystal after immersion for four hours in THF, transforming to  $G_4TSPB(THF)_5$ ; (red)  $G_4TSPB(dioxane)_5$  single crystal after immersion for four hours in toluene, transforming to  $G_4TSPB(toluene)_3(dioxane)$ ; (pink)  $G_4TSPB(dioxane)_5$  single crystal after immersion for four hours in nitrobenzene, transforming to  $G_4TSPB(nitrobenzene)_{1.5}$ ; (black at top)  $G_4TSPB(dioxane)_5$  single crystal after immersion for four hours in aniline, transforming to  $G_4TSPB(aniline)_5$ . NMR solvent: dimethylsulfoxide.

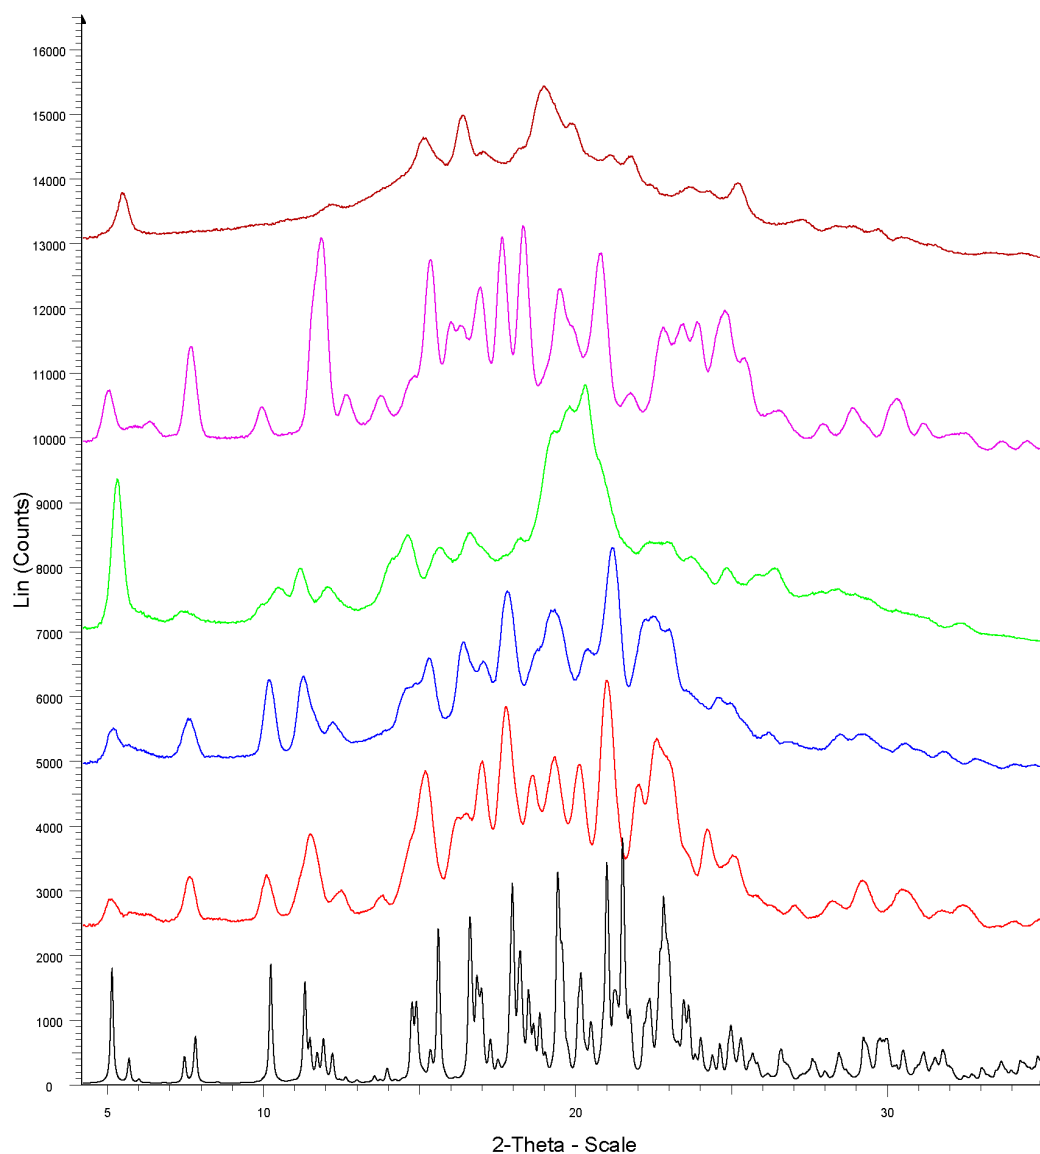

**Figure S9.** Powder X-ray diffraction of G<sub>4</sub>TSPB samples after exchange with various guests. From bottom to top: (black) Powder diffraction pattern calculated from single crystal structure of G<sub>4</sub>TSPB(dioxane)<sub>5</sub>; (red) experimental powder diffraction pattern of G<sub>4</sub>TSPB(dioxane)<sub>5</sub>; (blue) after immersion in THF for four hours; (green) after immersion in aniline for four hours, (purple) after immersion in toluene for four hours; (brown) after immersion in nitrobenzene for four hours.

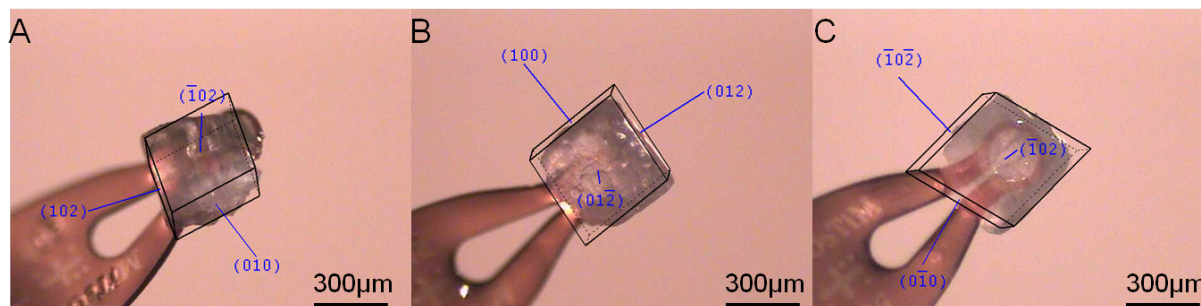

**Figure S10.** (A) Crystal of  $G_4TSPB(dioxane)_5$  and indexed faces. (B) Crystal from A after immersion in THF for four hours, transforming to  $G_4TSPB(THF)_5$ . (C) Crystal from B after immersion in dioxane for four hours, reverting back to  $G_4TSPB(dioxane)_5$ .

**Table S2.** Crystallographic information for crystals A, B and C mentioned in Figure S10.

| compound                   | $G_4TSPB(dioxane)_5$ | $G_4TSPB(THF)_5$ | $G_4TSPB(dioxane)_5$ |
|----------------------------|----------------------|------------------|----------------------|
| crystal system             | Triclinic            | Triclinic        | Triclinic            |
| space group                | $P1$                 | $P1$             | $P1$                 |
| $a$ (Å)                    | 16.068(4)            | 12.043(5)        | 16.19                |
| $b$ (Å)                    | 18.326(4)            | 15.891(6)        | 18.47                |
| $c$ (Å)                    | 35.252(8)            | 34.087(13)       | 35.49                |
| $\alpha$ (deg)             | 80.336(3)            | 84.671(5)        | 80.16                |
| $\beta$ (deg)              | 85.481(3)            | 87.393(5)        | 85.55                |
| $\gamma$ (deg)             | 77.775(3)            | 83.725(4)        | 77.67                |
| $V$ (Å <sup>3</sup> )      | 9990.95              | 6452.18          | 10204                |
| temp (K)                   | 100(2)               | 100(2)           | 100(2)               |
| $Z$                        | 6                    | 4                | \                    |
| $R_1$ [ $I > 2\sigma(I)$ ] | 0.1302               | 0.1405           | \                    |



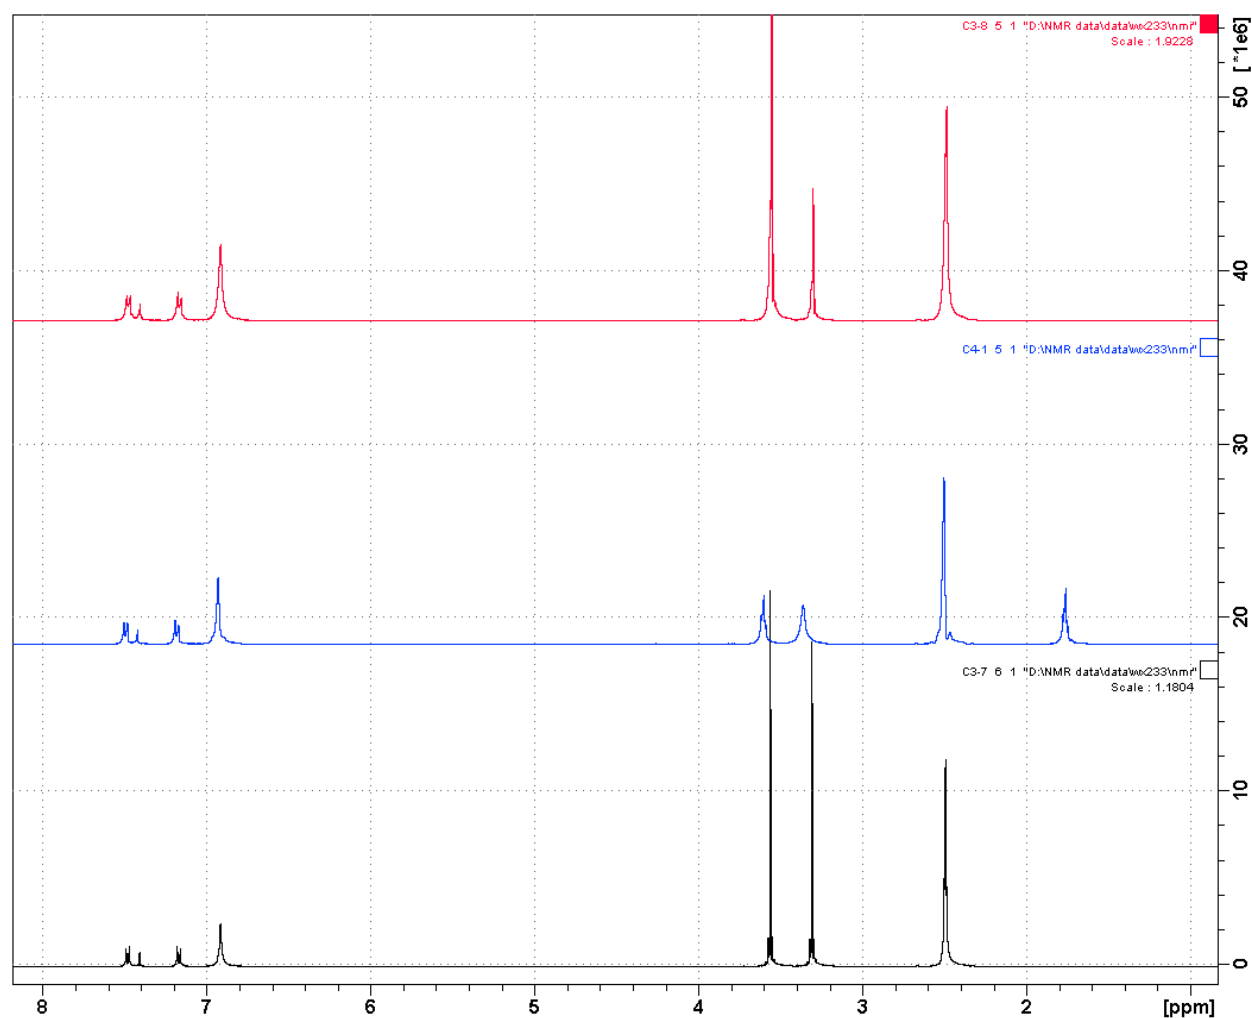

**Figure S11.** From bottom to top: (black) NMR spectrum of a  $\text{G}_4\text{TSPB} \cdot (\text{dioxane})_5$  single crystal; (blue)  $\text{G}_4\text{TSPB} \cdot (\text{dioxane})_5$  single crystal after immersion in THF for four hours, transforming to  $\text{G}_4\text{TSPB} \cdot (\text{THF})_5$ ; (red) the  $\text{G}_4\text{TSPB} \cdot (\text{THF})_5$  crystal after immersion in dioxane for four hours, reverting to  $\text{G}_4\text{TSPB} \cdot (\text{dioxane})_5$ . NMR solvent: dimethylsulfoxide.

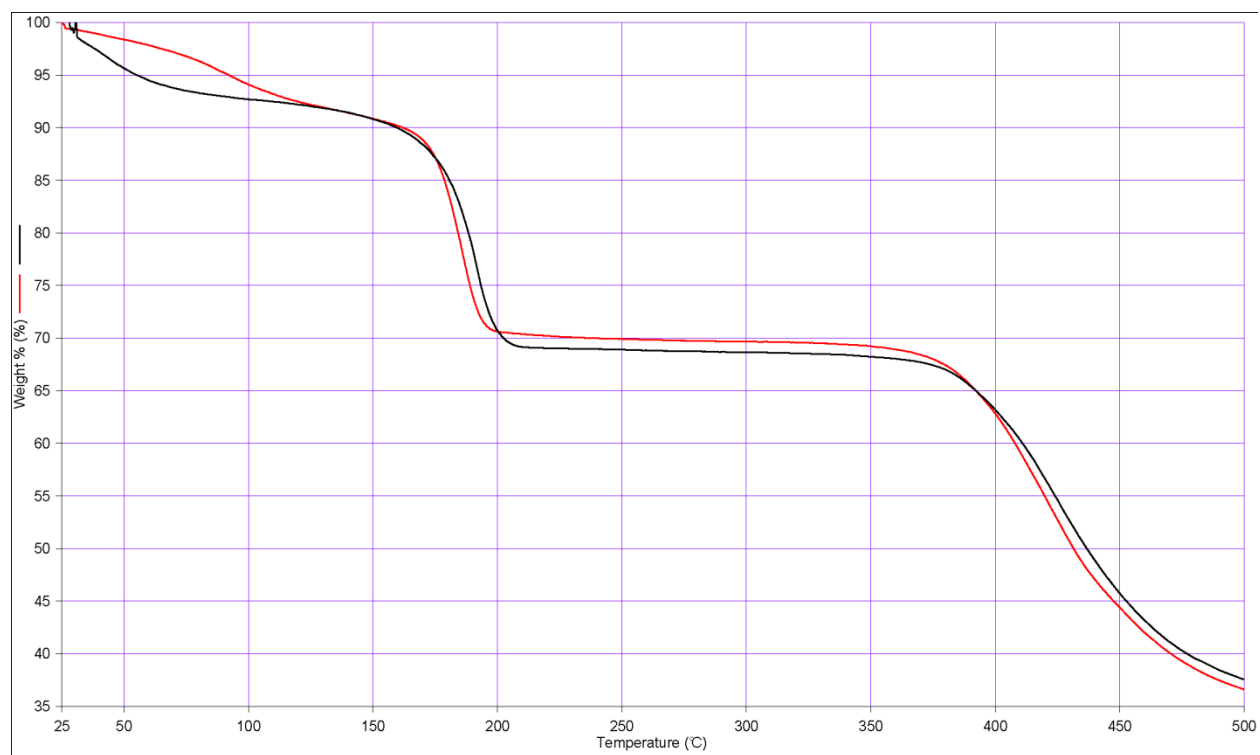

**Figure S12.** (black curve) TGA of G<sub>4</sub>TSPB'(dioxane)<sub>5</sub>; (red curve) G<sub>4</sub>TSPB'(THF)<sub>5</sub>. Heating rate = 10 °C/min.

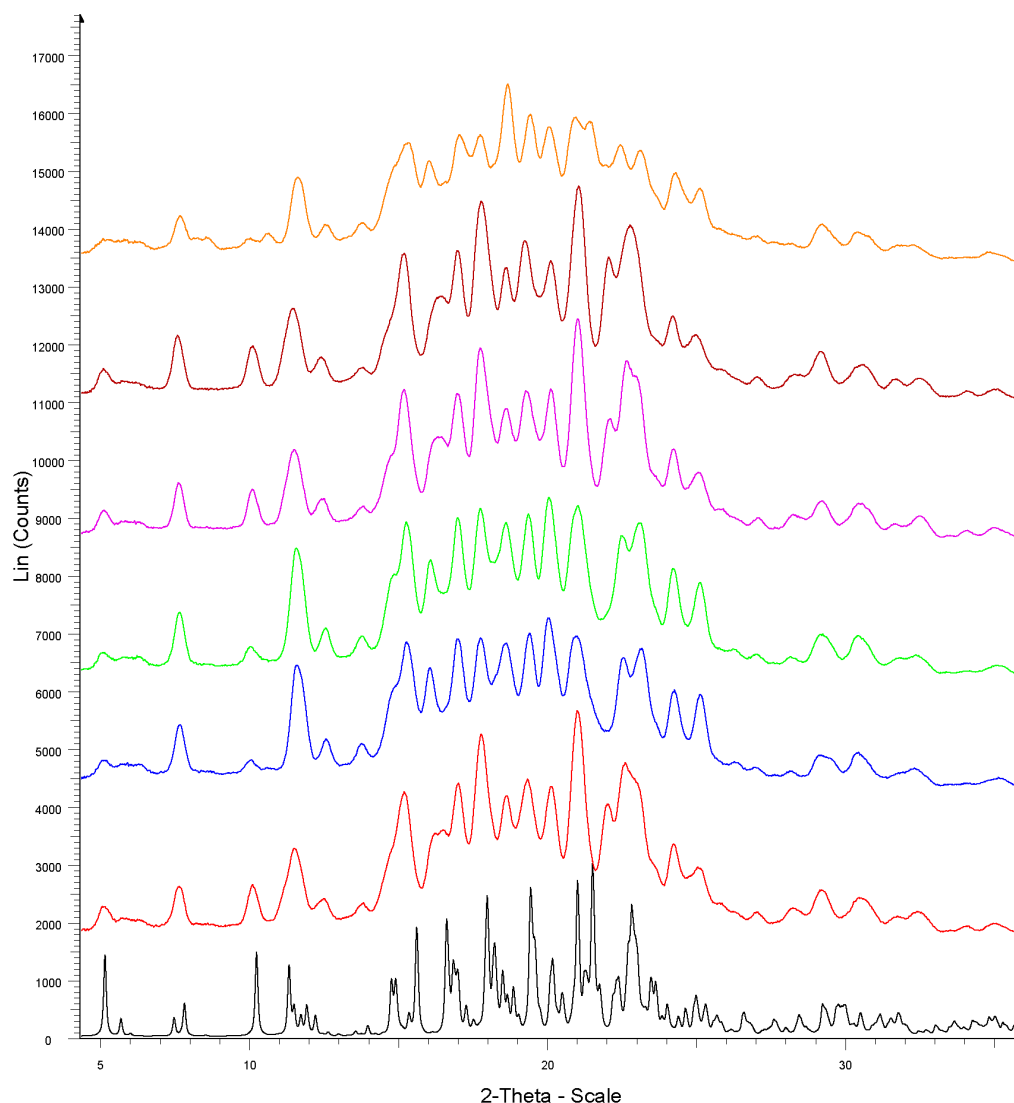

**Figure S13.** Powder X-ray diffraction illustrating the reversibility of transformation between  $G_4TSPB(dioxane)_5$  and  $G_4TSPB(THF)_5$ . From bottom to top: (black) Powder pattern calculated from the single crystal structure of  $G_4TSPB(dioxane)_5$ ; (red)  $G_4TSPB(dioxane)_5$  after immersion in THF for four hours followed by immersion in dioxane for four hours; (blue) first repetition of the same cycle; (green) second repetition of the same cycle; (purple) third repetition of the same cycle; (brown) fourth repetition of the same cycle.

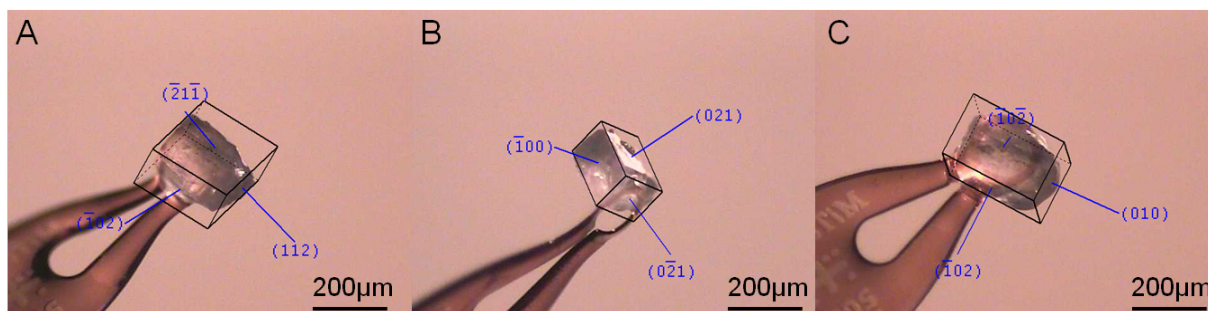

**Figure S14.** (A) Crystal of  $G_4TSPB(dioxane)_5$  and indexed faces. (B) Crystal from A after immersion in toluene for four hours, transforming to  $G_4TSPB(toluene)_3(dioxane)$ . (C) Crystal from B after immersion in dioxane for four hours, reverting back to  $G_4TSPB(dioxane)_5$ .

**Table S3.** Crystallographic information for crystals A, B and C in Figure S14.

| compound                   | $G_4TSPB(dioxane)_5$ | $G_4TSPB(toluene)_3(dioxane)$ | $G_4TSPB(dioxane)_5$ |
|----------------------------|----------------------|-------------------------------|----------------------|
| crystal system             | Triclinic            | Monoclinic                    | Triclinic            |
| space group                | $P1$                 | $P2_1$                        | $P1$                 |
| $a$ (Å)                    | 16.068(4)            | 6.1781(11)                    | 16.21                |
| $b$ (Å)                    | 18.326(4)            | 35.439(6)                     | 18.47                |
| $c$ (Å)                    | 35.252(8)            | 15.264(3)                     | 35.63                |
| $\alpha$ (deg)             | 80.336(3)            | 90                            | 80.20                |
| $\beta$ (deg)              | 85.481(3)            | 100.518(3)                    | 85.71                |
| $\gamma$ (deg)             | 77.775(3)            | 90                            | 77.96                |
| $V$ (Å <sup>3</sup> )      | 9990.95              | 3285.83                       | 10269                |
| temp (K)                   | 100(2)               | 100(2)                        | 100(2)               |
| $Z$                        | 6                    | 2                             | \                    |
| $R_1$ [ $I > 2\sigma(I)$ ] | 0.1302               | 0.094                         | \                    |

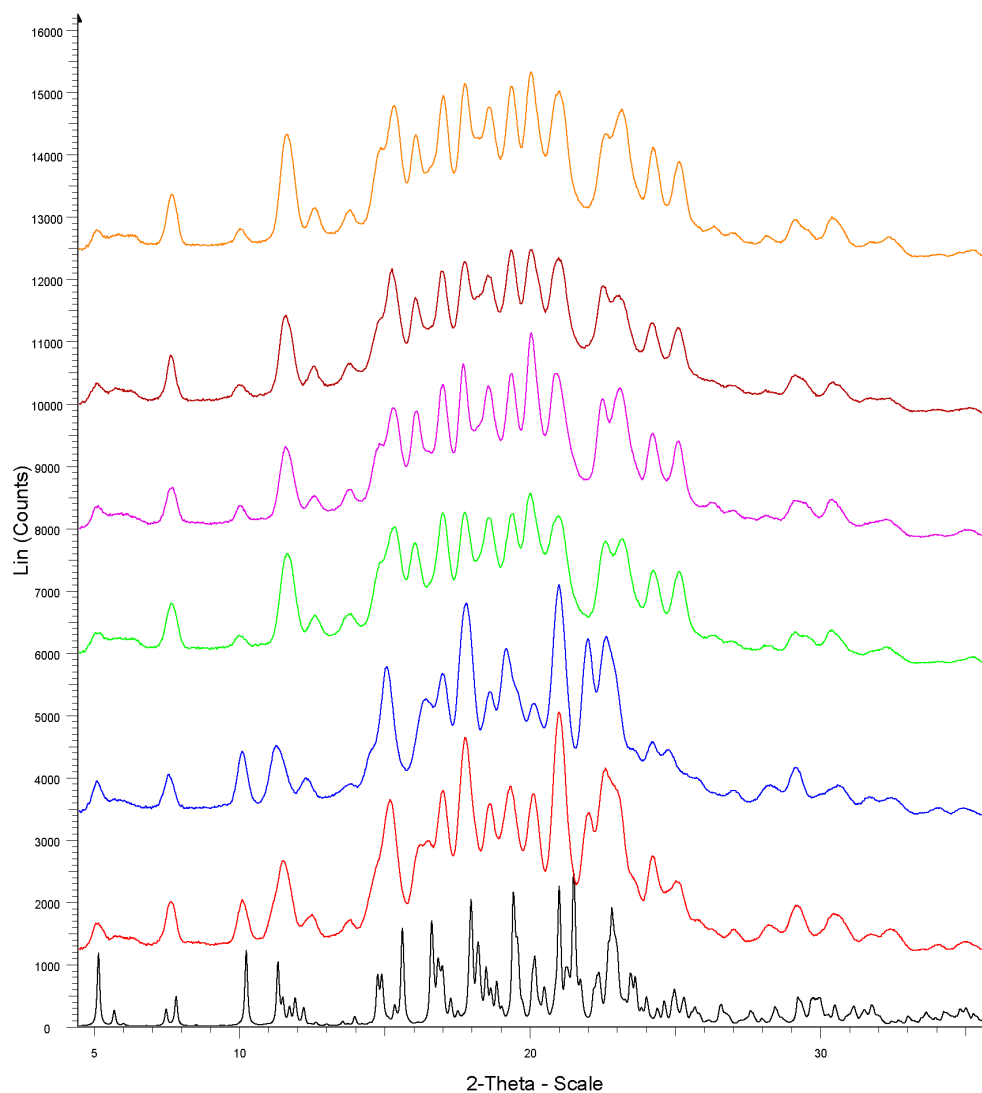

**Figure S15.** Powder X-ray diffraction illustrating the reversibility of transformation between  $G_4TSPB(dioxane)_5$  and  $G_4TSPB(toluenes)_3(dioxane)$ . From bottom to top: (black) Powder pattern calculated from the single crystal structure of  $G_4TSPB(dioxane)_5$ ; (red)  $G_4TSPB(dioxane)_5$  after immersion in toluene for four hours followed by immersion in dioxane for four hours; (blue) first repetition of the same cycle; (green) second repetition of the same cycle; (purple) third repetition of the same cycle; (brown) fourth repetition of the same cycle.

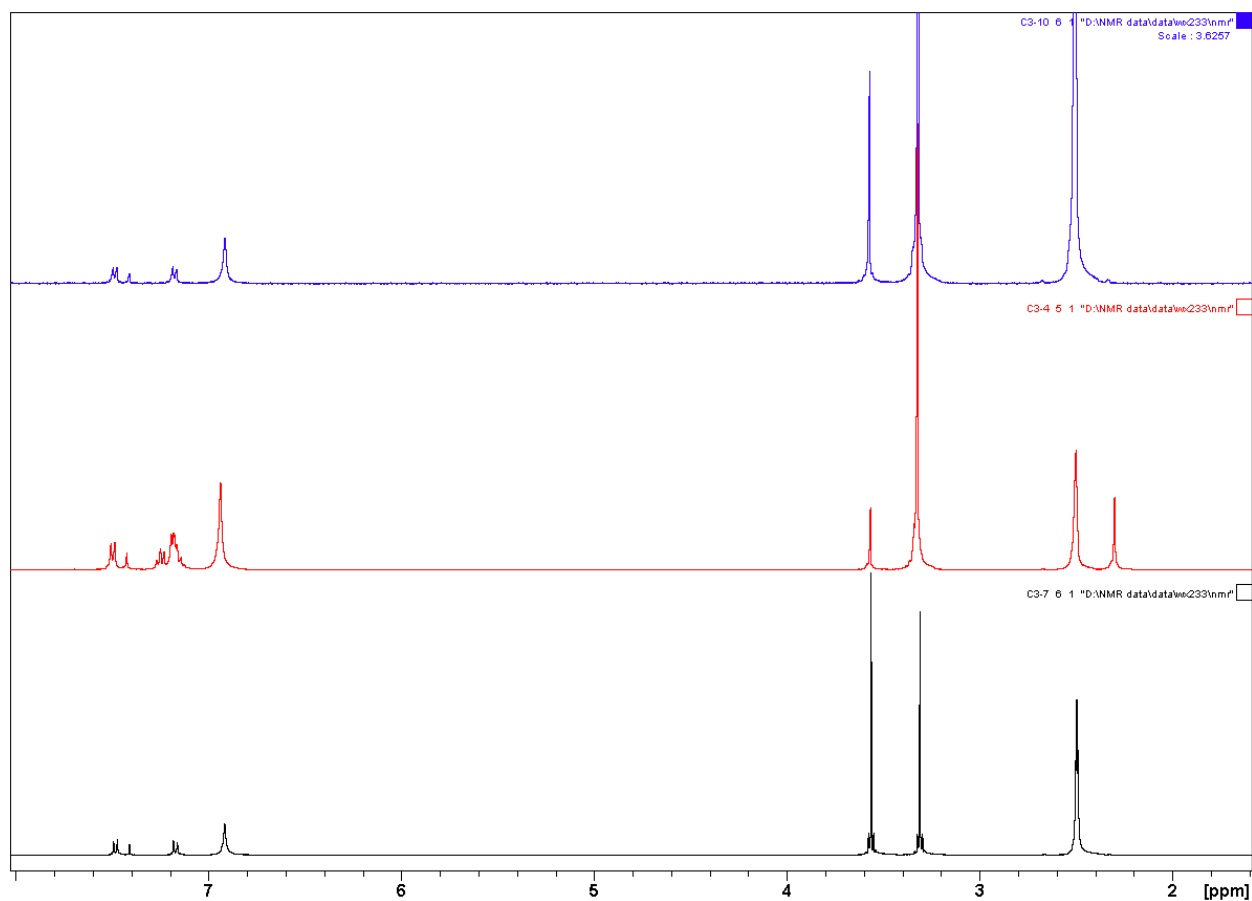

**Figure S16.** From bottom to top: (black) NMR spectrum of a  $\text{G}_4\text{TSPB}(\text{dioxane})_5$  single crystal; (red)  $\text{G}_4\text{TSPB}(\text{dioxane})_5$  single crystal after immersion in toluene for four hours, transforming to  $\text{G}_4\text{TSPB}(\text{toluene})_3(\text{dioxane})$ ; (blue)  $\text{G}_4\text{TSPB}(\text{toluene})_3(\text{dioxane})$  crystal after immersion in dioxane for four hours, reverting to  $\text{G}_4\text{TSPB}(\text{dioxane})_5$ . NMR solvent: dimethylsulfoxide.

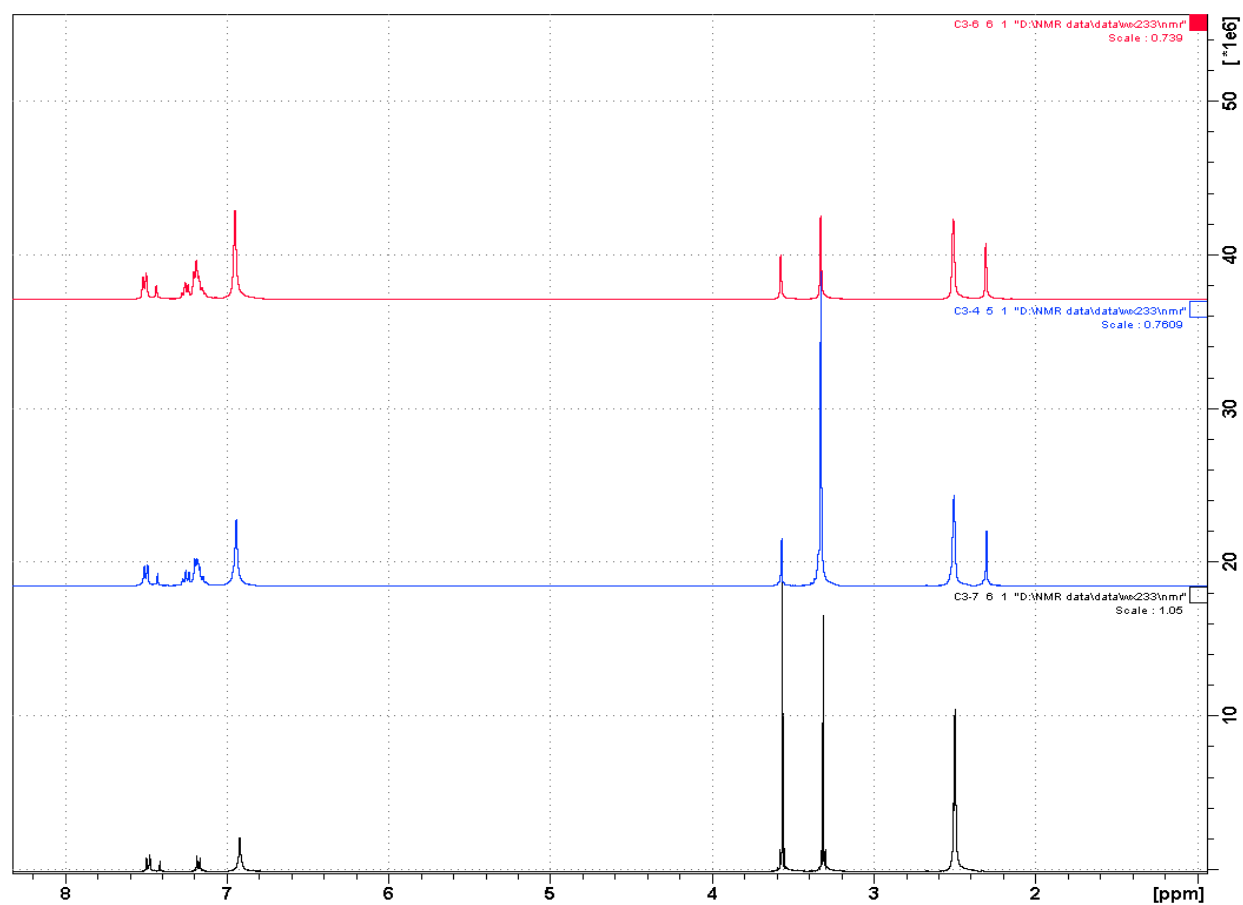

**Figure S17.** From bottom to top: (black) NMR spectrum of a  $G_4TSPB(dioxane)_5$  single crystal; (blue)  $G_4TSPB(dioxane)_5$  single crystal after immersion in toluene for one day, transforming to  $G_4TSPB(toluenes)_3(dioxane)$ ; (red)  $G_4TSPB(dioxane)_5$  single crystal after immersion in toluene for nine days, transforming to  $G_4TSPB(toluenes)_3(dioxane)$  but with no further exchange with toluene. NMR solvent: dimethylsulfoxide.

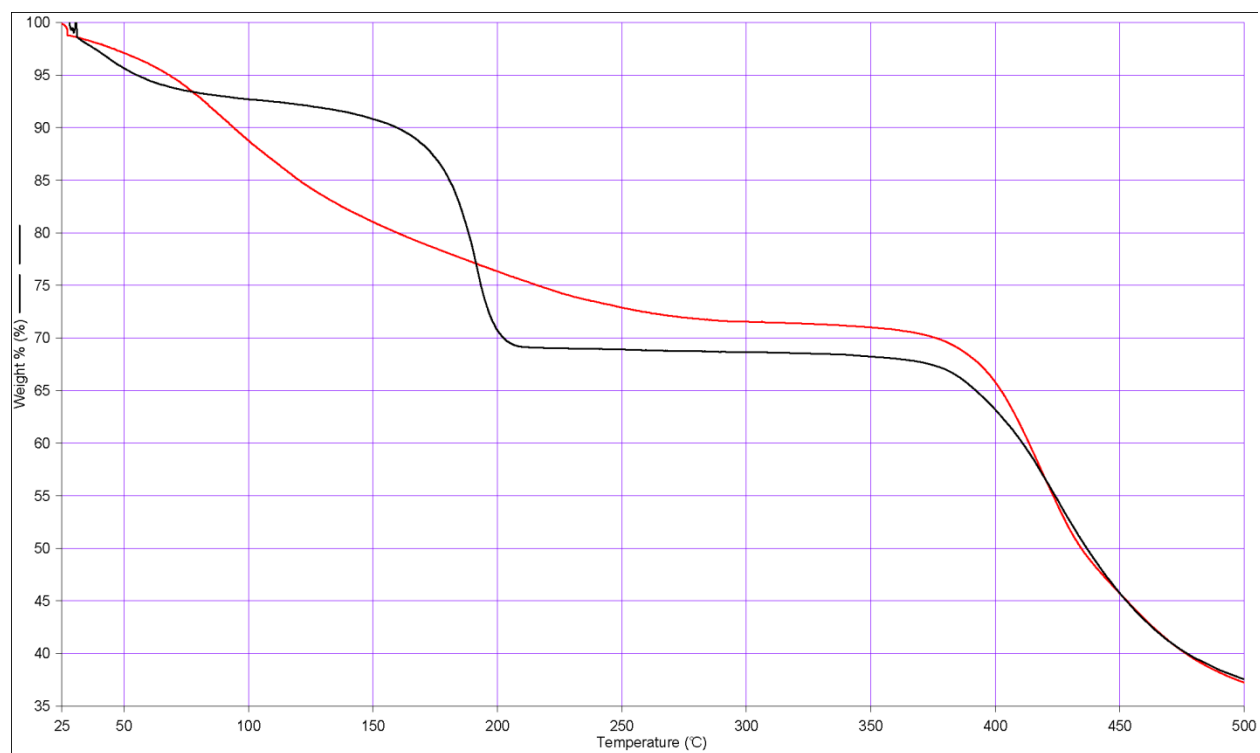

**Figure S18.** (black curve) TGA of G<sub>4</sub>TSPB(dioxane)<sub>5</sub>; (red curve) G<sub>4</sub>TSPB(toluenes)<sub>3</sub>(dioxane). Heating rate = 10 °C/min.



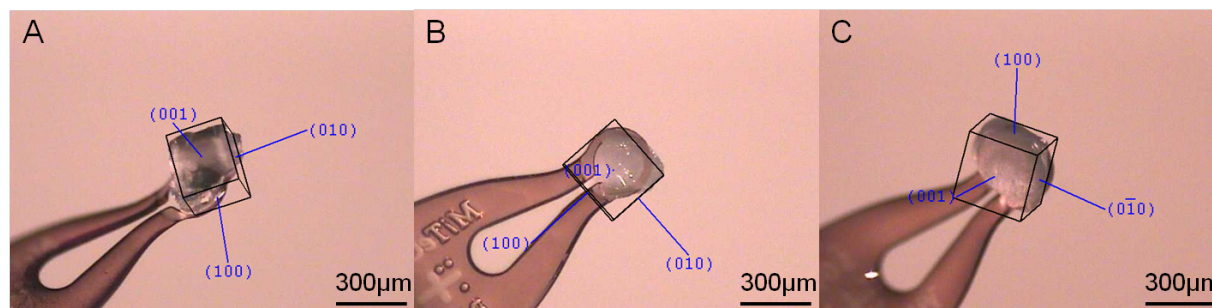

**Figure S19.** (A) Crystal of  $G_4TSPB(THF)_5$  and indexed faces. (B) Crystal from A after immersion in toluene for four hours, transforming to  $G_4TSPB(toluene)_3(THF)_{0.5}$ . (C) Crystal from B after immersion in dioxane for four hours, reverting to  $G_4TSPB(THF)_5$ .

**Table S4.** Crystallographic information for crystals A, B and C in Figure S19.

| compound                   | $G_4TSPB(THF)_5$ | $G_4TSPB(toluene)_3(THF)_{0.5}$ | $G_4TSPB(THF)_5$ |
|----------------------------|------------------|---------------------------------|------------------|
| crystal system             | Triclinic        | Monoclinic                      | Triclinic        |
| space group                | $P1$             | $\downarrow$                    | $P1$             |
| $a$ (Å)                    | 12.043(5)        | 30.01                           | 12.18            |
| $b$ (Å)                    | 15.891(6)        | 6.29                            | 16.03            |
| $c$ (Å)                    | 34.087(13)       | 35.74                           | 34.42            |
| $\alpha$ (deg)             | 84.671(5)        | 90                              | 85.02            |
| $\beta$ (deg)              | 87.393(5)        | 94.69                           | 88.51            |
| $\gamma$ (deg)             | 83.725(4)        | 90                              | 83.48            |
| $V$ (Å <sup>3</sup> )      | 6452.18          | 6720                            | 6627             |
| temp (K)                   | 100(2)           | 100(2)                          | 100(2)           |
| $Z$                        | 4                | 4                               | 4                |
| $R_1$ [ $I > 2\sigma(I)$ ] | 0.1405           | $\downarrow$                    | $\downarrow$     |

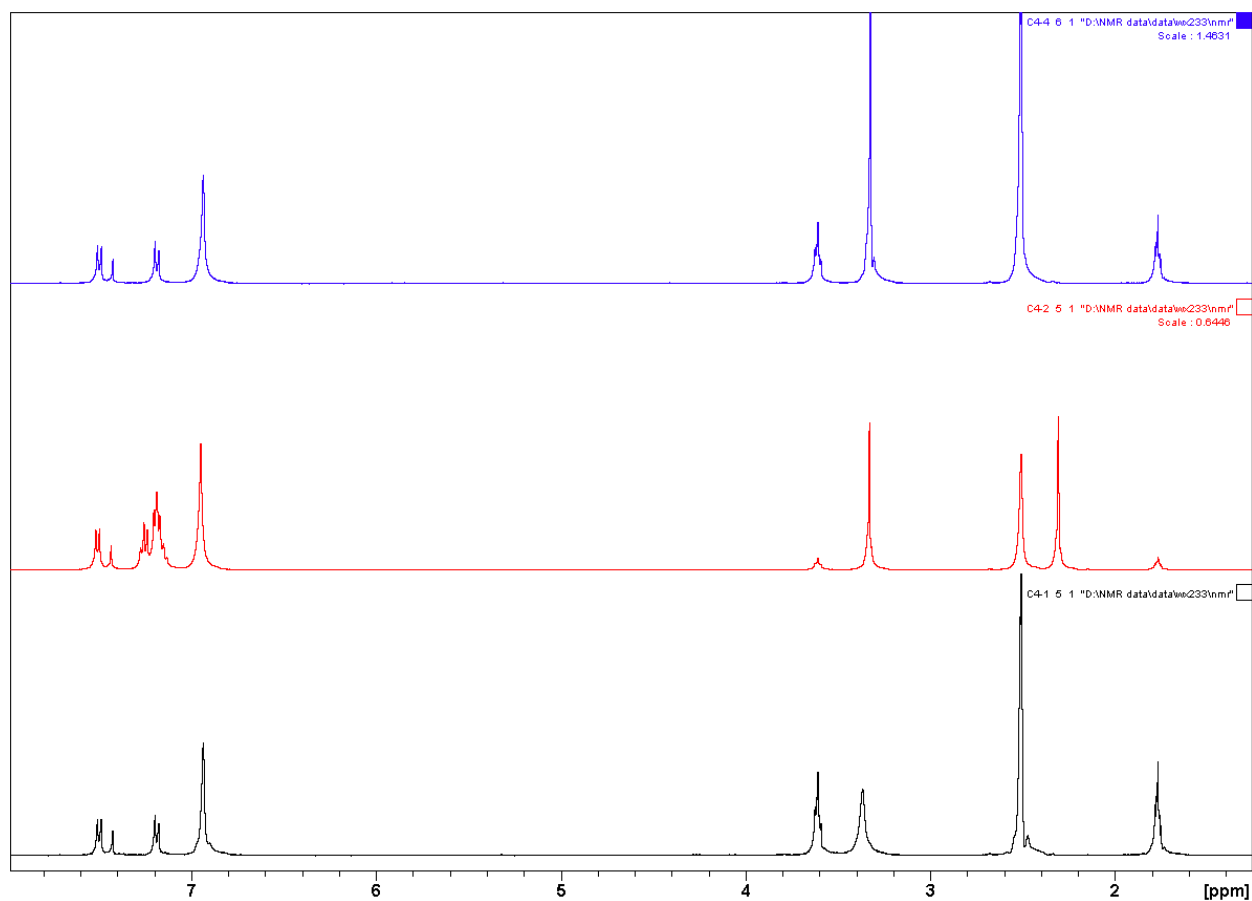

**Figure S20.** From bottom to top: (black) NMR spectrum of a  $G_4TSPB(THF)_5$  single crystal; (red)  $G_4TSPB'(THF)_5$  single crystal after immersion in toluene for four hours, transforming to  $G_4TSPB'(toluene)_3(THF)_{0.5}$ ; (blue)  $G_4TSPB(toluene)_3(THF)_{0.5}$  single crystal after immersion in THF for four hours, reverting to  $G_4TSPB'(THF)_5$ . NMR solvent: dimethylsulfoxide.

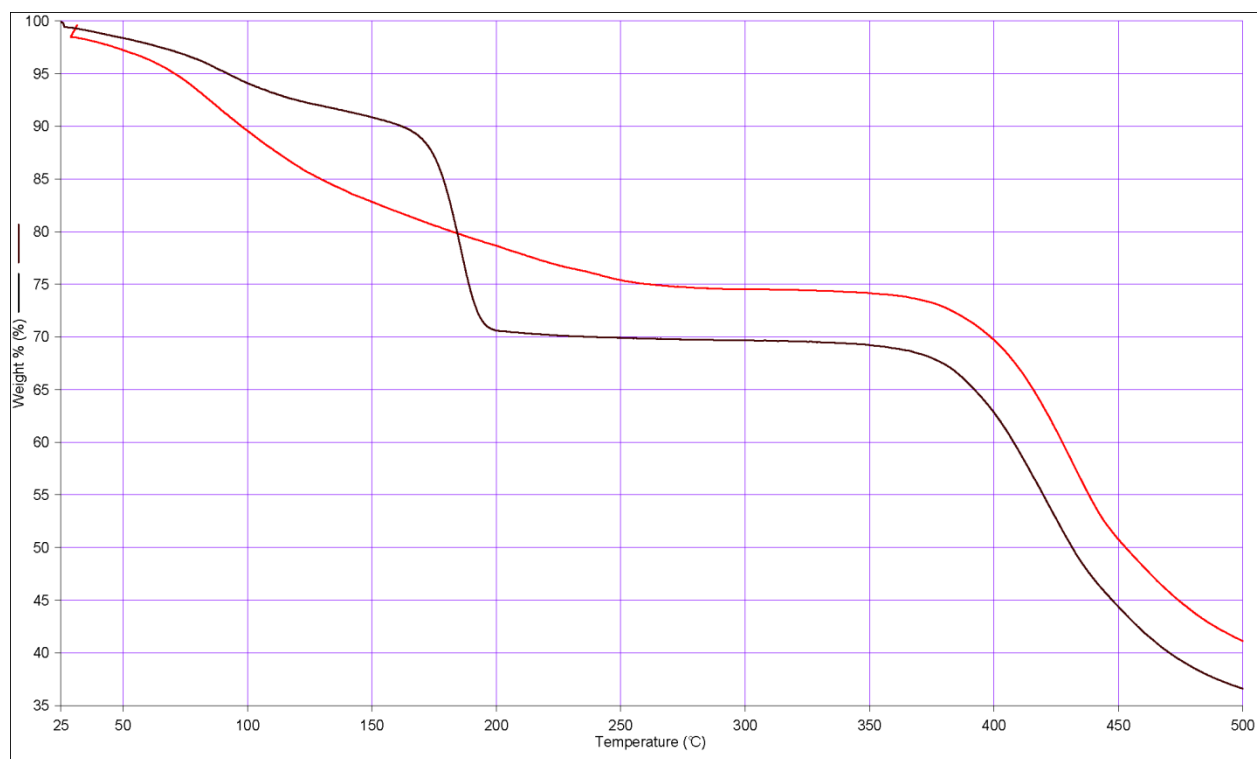

**Figure S21.** (black curve) TGA of  $G_4TSPB \cdot (THF)_5$ ; (red curve)  $G_4TSPB \cdot (toluene)_3(THF)_{0.5}$ . Heating rate = 10 °C/min.

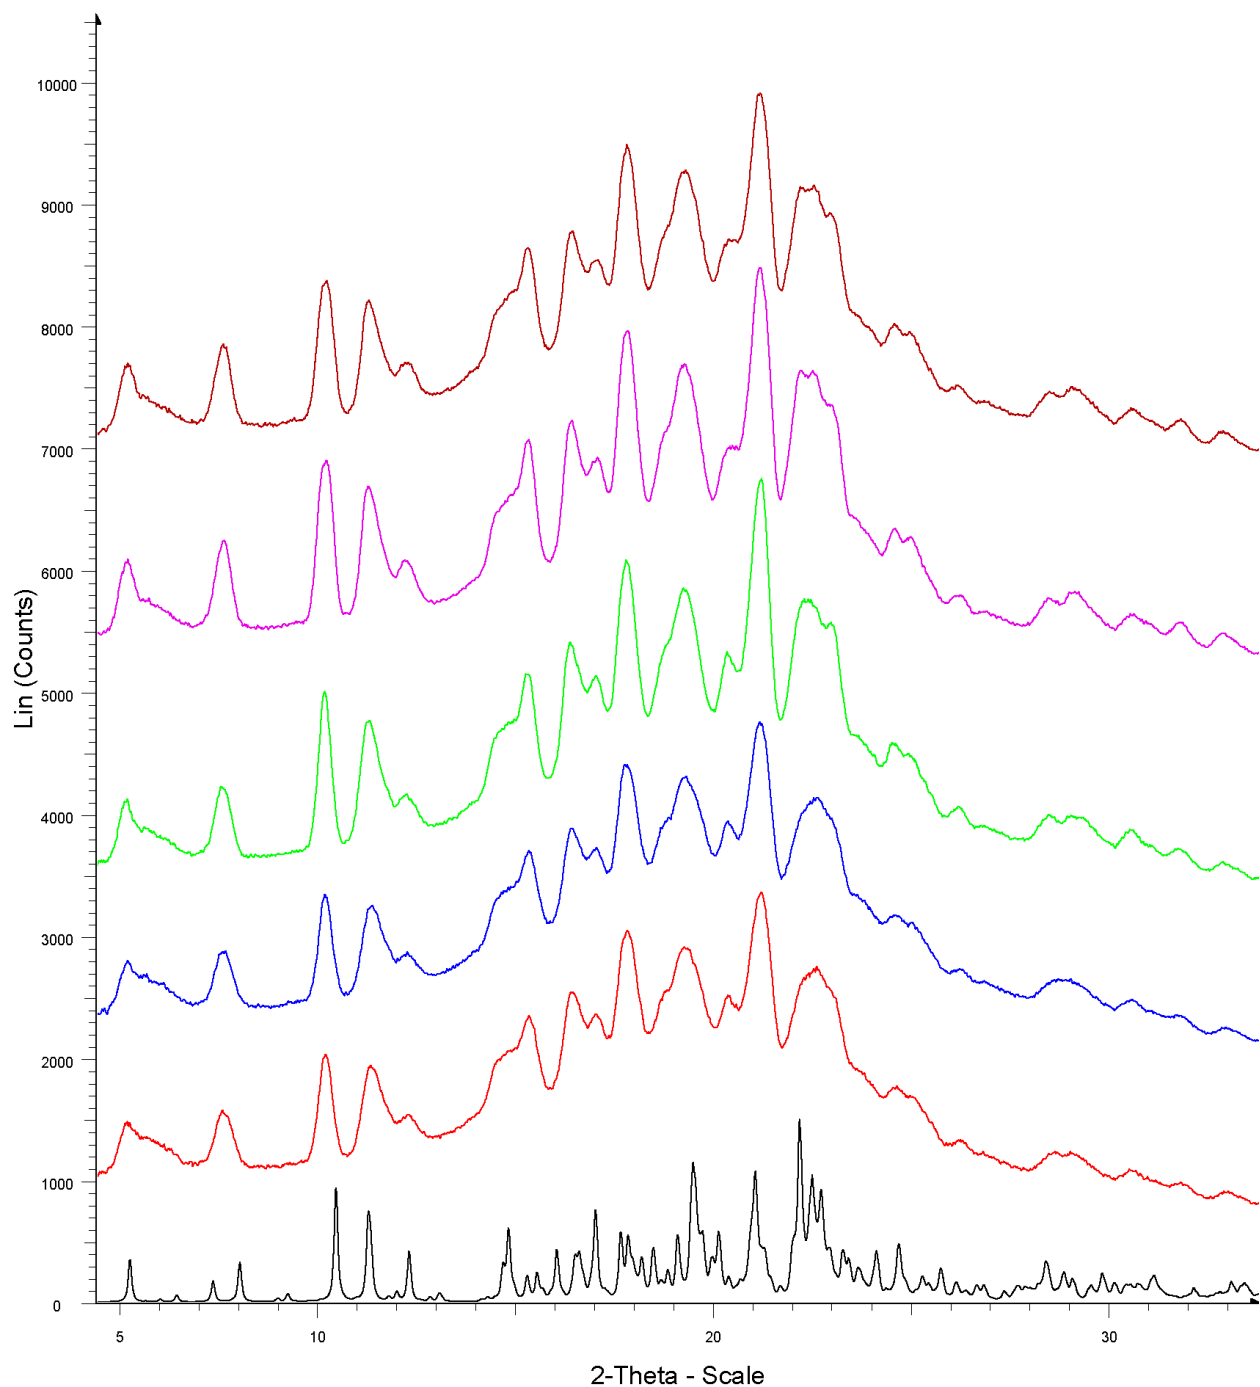

**Figure S22.** Powder X-ray diffraction illustrating the reversibility of transformation between  $G_4TSPB(THF)_5$  and  $G_4TSPB(toluenes)_3(THF)_{0.5}$ . From bottom to top: (black) Powder pattern calculated from the single crystal structure of  $G_4TSPB(THF)_5$ ; (red)  $G_4TSPB(THF)_5$  after immersion in toluene for four hours followed by immersion in THF for four hours; (blue) first repetition of the same cycle; (green) second repetition of the same cycle; (purple) third repetition of the same cycle; (brown) fourth repetition of the same cycle.

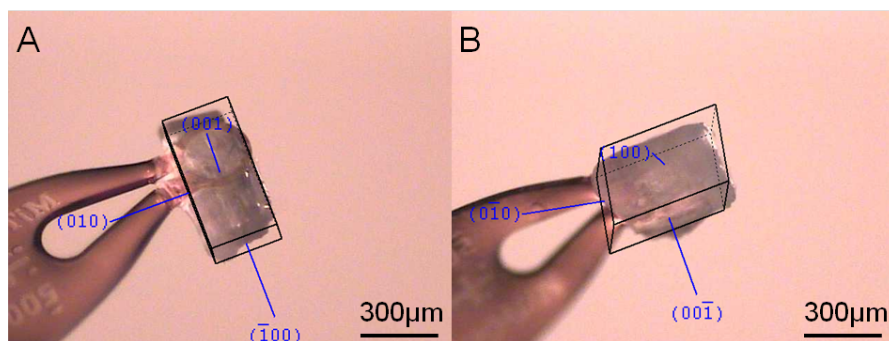

**Figure S23.** (A) Crystal of  $G_4TSPB \cdot (toluene)_3(dioxane)$  and indexed faces. (B) Crystal from A after immersion in THF for four hours, transforming to  $G_4TSPB \cdot (THF)_5$ .

**Table S5.** Crystallographic information for crystals A and B in Figure S23.

| compound              | $G_4TSPB \cdot (toluene)_3(dioxane)$ | $G_4TSPB \cdot (THF)_5$ |
|-----------------------|--------------------------------------|-------------------------|
| crystal system        | Monoclinic                           | Triclinic               |
| space group           | $P2_1$                               | $P1$                    |
| $a$ (Å)               | 6.25                                 | 12.12                   |
| $b$ (Å)               | 35.74                                | 16.09                   |
| $c$ (Å)               | 15.38                                | 34.40                   |
| $\alpha$ (deg)        | 90                                   | 84.85                   |
| $\beta$ (deg)         | 100.65                               | 87.19                   |
| $\gamma$ (deg)        | 90                                   | 83.63                   |
| $V$ (Å <sup>3</sup> ) | 3375                                 | 6634                    |
| temp (K)              | 100(2)                               | 100(2)                  |

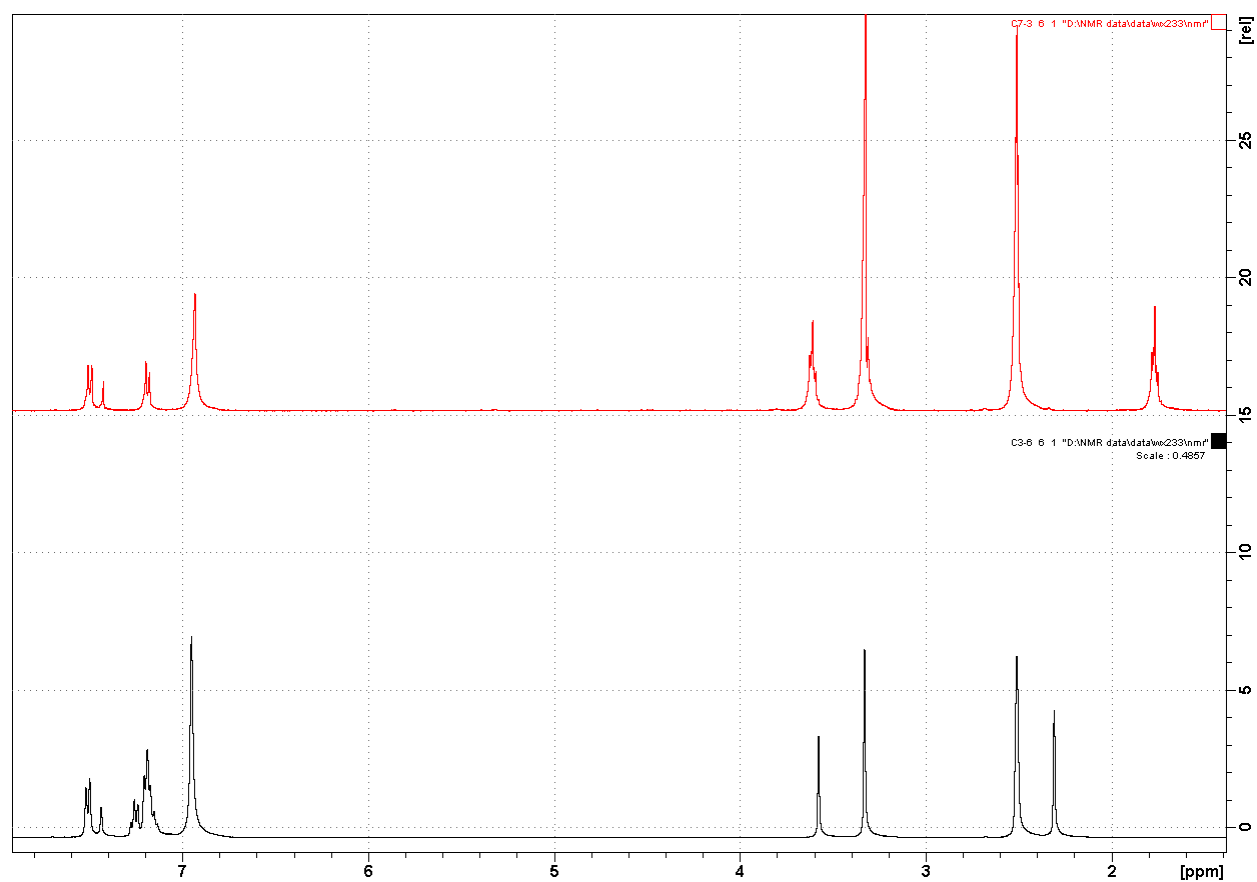

**Figure S24.** From bottom to top: (black) NMR spectrum of a  $G_4TSPB'(toluene)_3(dioxane)$  single crystal; (red)  $G_4TSPB'(toluene)_3(dioxane)$  single crystal after immersion in THF for four hours, transforming to  $G_4TSPB'(THF)_5$ . NMR solvent: dimethylsulfoxide.

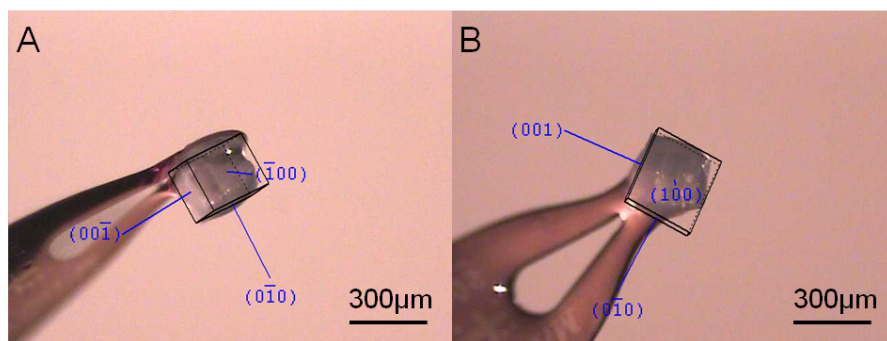

**Figure S25.** (A) Crystal of  $G_4TSPB(toluene)_3(THF)_{0.5}$  and indexed faces. (B) Crystal from A after immersion in dioxane for four hours, transforming to  $G_4TSPB(dioxane)_5$ .

**Table S6.** Crystallographic information for crystals A and B in Figure S25.

| compound              | $G_4TSPB(toluene)_3(THF)_{0.5}$ | $G_4TSPB(dioxane)_5$ |
|-----------------------|---------------------------------|----------------------|
| crystal system        | Monoclinic                      | Triclinic            |
| space group           | /                               | $P1$                 |
| $a$ (Å)               | 30.18                           | 16.20                |
| $b$ (Å)               | 6.29                            | 18.48                |
| $c$ (Å)               | 35.68                           | 35.70                |
| $\alpha$ (deg)        | 90                              | 86.26                |
| $\beta$ (deg)         | 94.41                           | 89.32                |
| $\gamma$ (deg)        | 90                              | 77.97                |
| $V$ (Å <sup>3</sup> ) | 6758                            | 10435                |
| temp (K)              | 100(2)                          | 100(2)               |

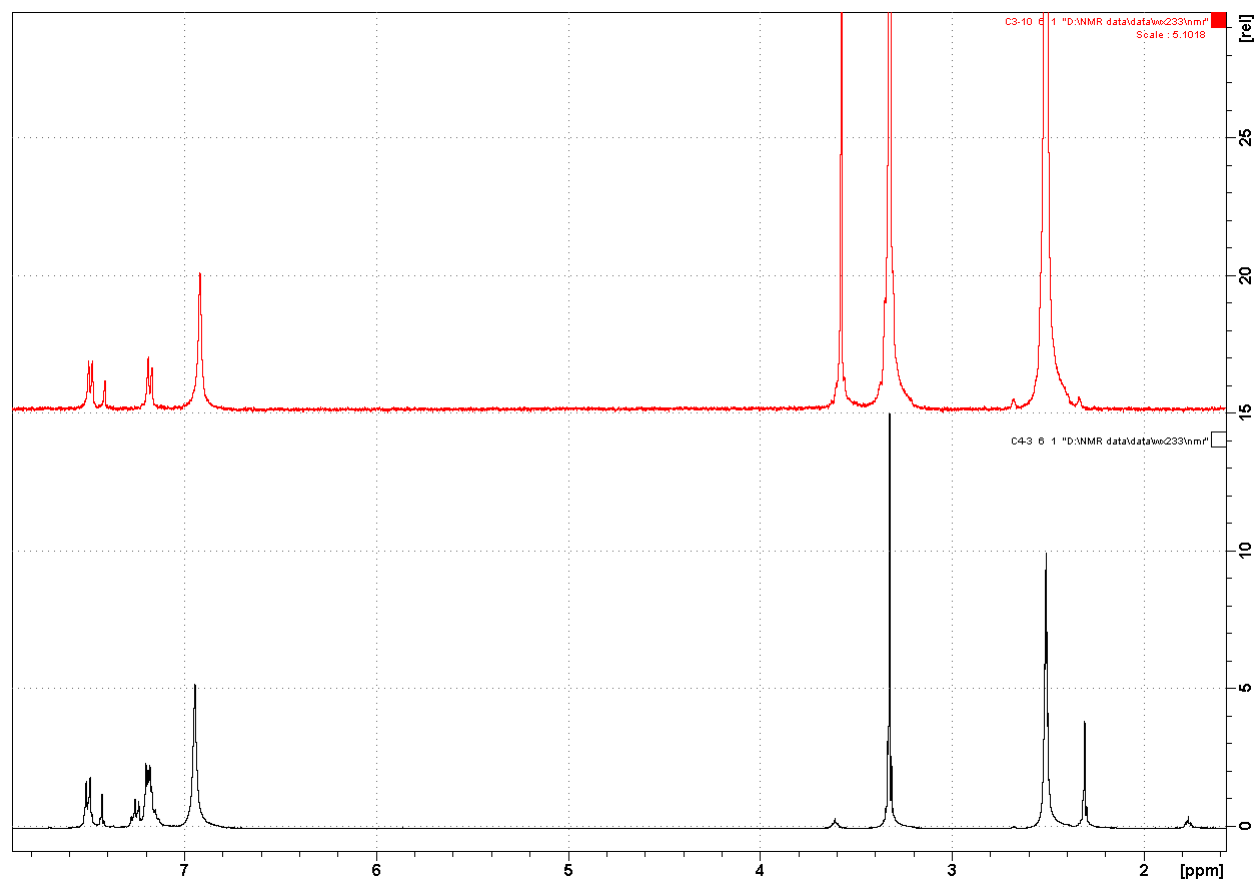

**Figure S26.** From bottom to top: (black) NMR spectrum of a  $\text{G}_4\text{TSPB}(\text{toluene})_3(\text{THF})_{0.5}$  single crystal; (red)  $\text{G}_4\text{TSPB}(\text{toluene})_3(\text{THF})_{0.5}$  single crystal after immersion in dioxane for four hours, transforming to  $\text{G}_4\text{TSPB}(\text{dioxane})_5$ . NMR solvent: dimethylsulfoxide.



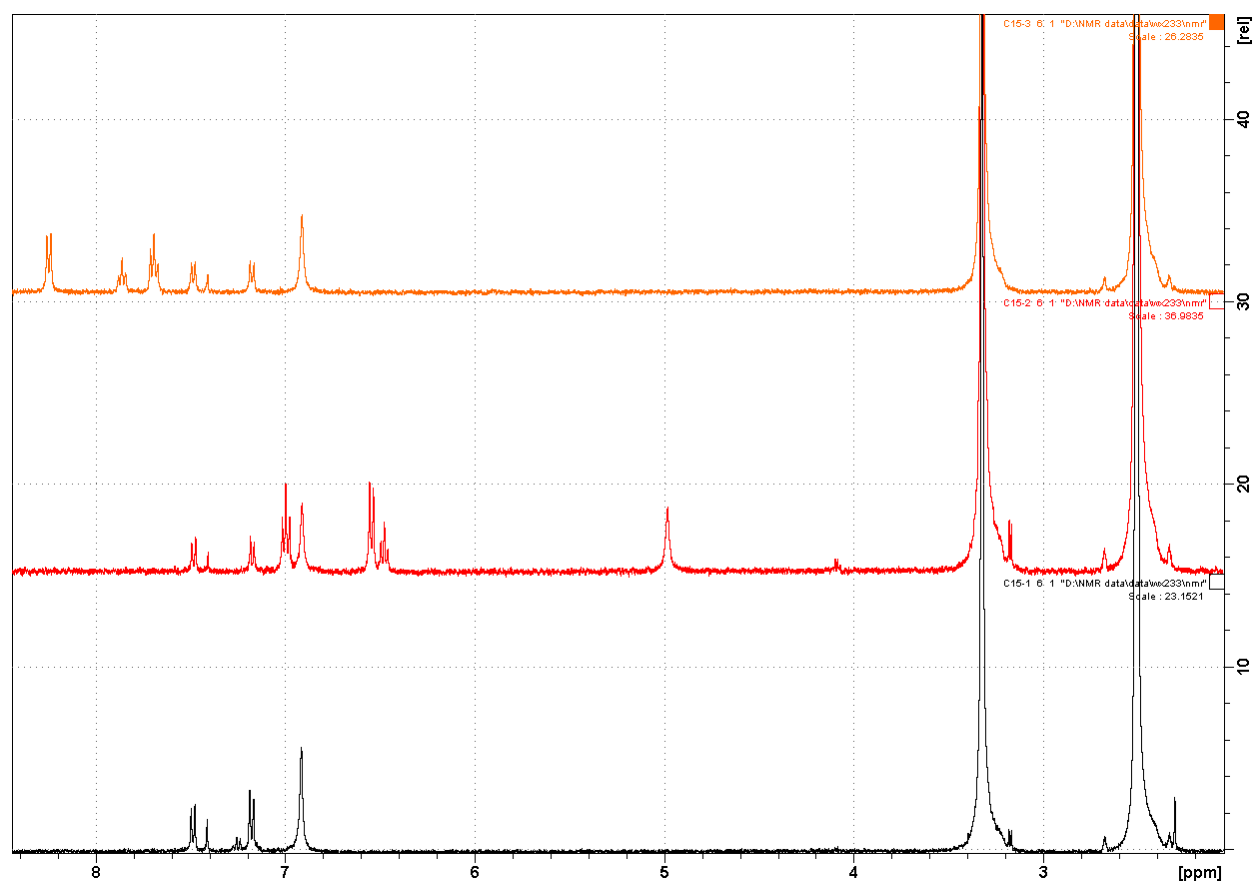

**Figure S27.** From bottom to top: (black) NMR spectrum of G<sub>4</sub>TSPB precipitate formed by layering toluene on a methanol solution of G<sub>4</sub>TSPB; (red) G<sub>4</sub>TSPB precipitate formed by layering a methanol solution of G<sub>4</sub>TSPB on aniline; (orange) G<sub>4</sub>TSPB precipitate formed by layering a methanol solution of G<sub>4</sub>TSPB on nitrobenzene. NMR solvent: dimethylsulfoxide. Attempts to grow single crystals of toluene, aniline and nitrobenzene inclusion compounds were not successful.

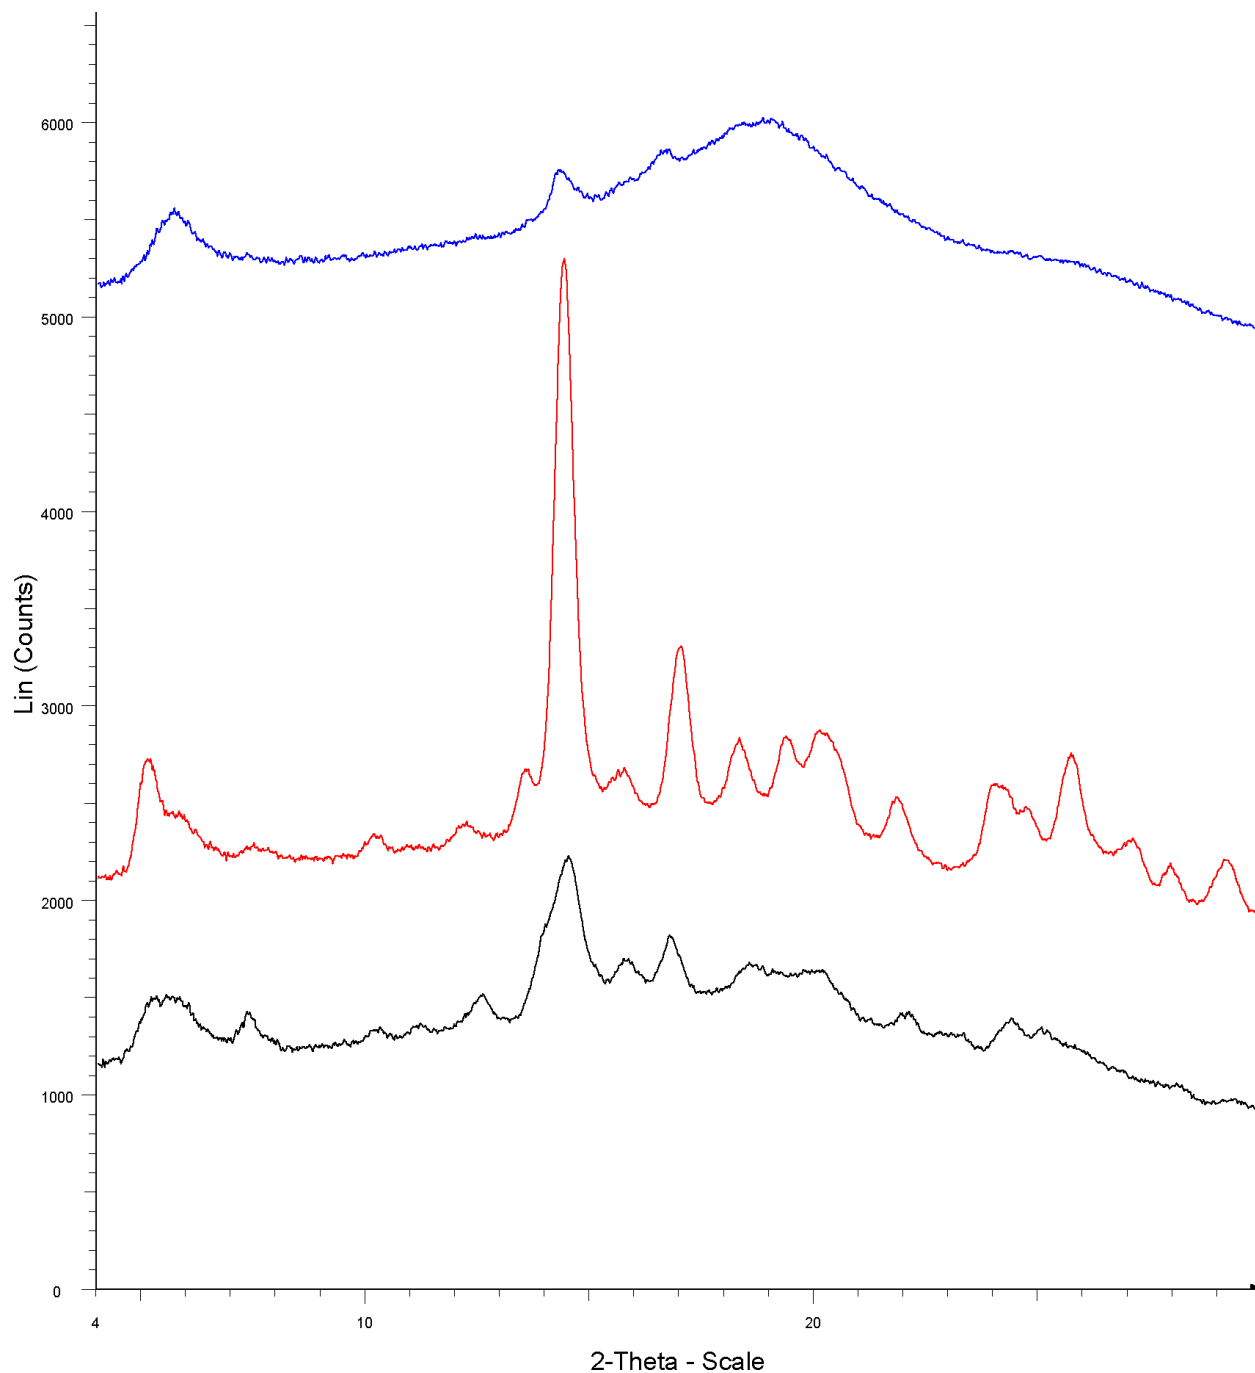

**Figure S28.** (black) Powder X-ray diffraction characterization of G<sub>4</sub>TSPB precipitate formed by layering toluene on a methanol solution of G<sub>4</sub>TSPB; (red) G<sub>4</sub>TSPB precipitate formed by layering a methanol solution of G<sub>4</sub>TSPB on aniline; (blue) G<sub>4</sub>TSPB precipitate formed by layering a methanol solution of G<sub>4</sub>TSPB on nitrobenzene.

## References

---

- <sup>1</sup> Sheldrick, G. M. SADABS, Program for empirical absorption correction of area-detector data, Universität Göttingen, Germany, **2008**
- <sup>2</sup> Sheldrick, G. M. SHELXS-97, Program for solution of crystal structures, Universität Göttingen, Germany, **1997**
- <sup>3</sup> Sheldrick, G. M. SHELXL-97. Program for refinement of crystal structures, Universität Göttingen, Germany, **1997**
- <sup>4</sup> Spek, A. L. *J. App. Cryst.*, **2003**, 36, 7
- <sup>5</sup> GADDS and PILOT (version 2009.5). *Program for Bruker CCD X-ray Diffractometer Control*, Bruker AXS Inc., Madison, WI, **2009**.
- <sup>6</sup> DIFFRAC<sup>plus</sup> EVA (version 15). Software Package for Powder Diffraction. Bruker AXS Inc., Madison, WI, **2009**.
- <sup>7</sup> Mercury CSD (version 2013). *Program for Crystal Structure Visualization*, The Cambridge Crystallographic Data Centre (CCDC), Cambridge, UK, **2012**.
